# Supplementary material for: Effect of Acute Enriched Environment Exposure on Brain Oscillations and Activation of the Translation Initiation Factor 4E-BPs at Synapses across Wake and Sleep in Rats
Source: Preprints.org preprint supplement (doi:10.20944/preprints202308.0174.v1), 2023-08-02
Supplement: Supplementary file 1 [file supplementary]

## Sheet: SD_EE (related to Fig.2A)
	Comparison to Baseline (Sidak's multiple comparisons test)
	AW								QW
	SD (FP)		SD (FC)		EE (FP)		EE (FC)		SD (FP)		SD (FC)		EE (FP)		EE (FC)
Two-way RM ANOVA	Time:	ns	Time:	ns	Time:	P< 0.0001	Time:	P< 0.0001	Time:	P< 0.0001	Time:	P< 0.0001	Time:	P< 0.0001	Time:	P< 0.0001
	Frequency:	P< 0.0001	Frequency:	P< 0.0001	Frequency:	P< 0.0001	Frequency:	P< 0.0001	Frequency:	P< 0.0001	Frequency:	P< 0.0001	Frequency:	P< 0.0001	Frequency:	P< 0.0001
	Interaction:	ns	Interaction:	ns	Interaction:	P< 0.0001	Interaction:	P< 0.0001	Interaction:	P< 0.0001	Interaction:	P< 0.0001	Interaction:	P< 0.0001	Interaction:	P< 0.0001
Frequency	Significance	Ad. P Value	Significance	Ad. P Value	Significance	Ad. P Value	Significance	Ad. P Value	Significance	Ad. P Value	Significance	Ad. P Value	Significance	Ad. P Value	Significance	Ad. P Value
0.488281	ns	>0.9999	*	0.0492	****	<0.0001	****	<0.0001	****	<0.0001	****	<0.0001	****	<0.0001	****	<0.0001
0.976563	ns	>0.9999	ns	>0.9999	**	0.0068	****	<0.0001	****	<0.0001	****	<0.0001	****	<0.0001	****	<0.0001
1.46484	ns	>0.9999	ns	>0.9999	ns	0.1512	****	<0.0001	****	<0.0001	*	0.0201	****	<0.0001	****	<0.0001
1.95312	ns	>0.9999	ns	>0.9999	ns	0.8423	****	<0.0001	ns	0.2739	ns	>0.9999	****	<0.0001	****	<0.0001
2.44141	ns	>0.9999	ns	>0.9999	ns	>0.9999	***	0.0008	ns	>0.9999	ns	>0.9999	****	<0.0001	****	<0.0001
2.92969	ns	>0.9999	ns	>0.9999	ns	>0.9999	**	0.0017	ns	>0.9999	ns	0.9959	****	<0.0001	****	<0.0001
3.41797	ns	>0.9999	ns	>0.9999	ns	>0.9999	ns	0.1664	ns	0.9986	ns	0.9322	****	<0.0001	****	<0.0001
3.90625	ns	>0.9999	ns	>0.9999	ns	>0.9999	ns	0.6279	ns	>0.9999	ns	>0.9999	****	<0.0001	****	<0.0001
4.39453	ns	>0.9999	ns	>0.9999	ns	>0.9999	ns	0.6911	ns	>0.9999	ns	>0.9999	**	0.008	*	0.0107
4.88281	ns	0.9999	ns	>0.9999	ns	>0.9999	ns	0.8559	ns	>0.9999	ns	>0.9999	*	0.0299	*	0.0359
5.37109	ns	0.9511	ns	>0.9999	ns	>0.9999	ns	0.8972	ns	>0.9999	ns	>0.9999	ns	0.1243	ns	0.0828
5.85938	ns	0.8661	ns	>0.9999	ns	>0.9999	ns	>0.9999	ns	>0.9999	ns	>0.9999	ns	>0.9999	ns	0.9938
6.34766	ns	0.5505	ns	>0.9999	ns	0.9606	ns	>0.9999	ns	>0.9999	ns	0.9322	ns	>0.9999	ns	>0.9999
6.83594	ns	0.1966	ns	>0.9999	****	<0.0001	ns	>0.9999	ns	>0.9999	ns	0.5571	ns	>0.9999	ns	>0.9999
7.32422	ns	0.4101	ns	>0.9999	****	<0.0001	ns	>0.9999	ns	0.1203	*	0.0347	**	0.0073	ns	0.9561
7.8125	ns	>0.9999	ns	>0.9999	ns	>0.9999	ns	>0.9999	****	<0.0001	ns	0.1523	****	<0.0001	ns	0.6592
8.30078	***	0.0007	ns	>0.9999	****	<0.0001	****	<0.0001	****	<0.0001	ns	0.5571	****	<0.0001	ns	0.2781
8.78906	****	<0.0001	ns	>0.9999	****	<0.0001	****	<0.0001	****	<0.0001	ns	0.9959	****	<0.0001	ns	0.4137
9.27734	**	0.0048	ns	>0.9999	****	<0.0001	****	<0.0001	**	0.0055	ns	>0.9999	****	<0.0001	ns	0.8997
9.76562	ns	0.98	ns	>0.9999	****	<0.0001	****	<0.0001	ns	0.7013	ns	>0.9999	****	<0.0001	ns	>0.9999
10.2539	ns	>0.9999	ns	>0.9999	****	<0.0001	**	0.0079	ns	>0.9999	ns	>0.9999	ns	0.1342	ns	>0.9999
10.7422	ns	>0.9999	ns	>0.9999	ns	0.5621	ns	0.4391	ns	>0.9999	ns	>0.9999	ns	0.9996	ns	>0.9999
11.2305	ns	>0.9999	ns	>0.9999	ns	>0.9999	ns	>0.9999	ns	>0.9999	ns	>0.9999	ns	>0.9999	ns	>0.9999
11.7188	ns	>0.9999	ns	>0.9999	ns	>0.9999	ns	>0.9999	ns	>0.9999	ns	>0.9999	ns	>0.9999	ns	>0.9999
12.207	ns	>0.9999	ns	>0.9999	ns	>0.9999	ns	>0.9999	ns	>0.9999	ns	>0.9999	ns	>0.9999	ns	>0.9999
12.6953	ns	>0.9999	ns	>0.9999	ns	>0.9999	ns	>0.9999	ns	>0.9999	ns	>0.9999	ns	>0.9999	ns	>0.9999
13.1836	ns	>0.9999	ns	>0.9999	ns	>0.9999	ns	>0.9999	ns	>0.9999	ns	>0.9999	ns	>0.9999	ns	>0.9999
13.6719	ns	>0.9999	ns	>0.9999	ns	>0.9999	ns	>0.9999	ns	>0.9999	ns	>0.9999	ns	>0.9999	ns	>0.9999
14.1602	ns	>0.9999	ns	>0.9999	ns	>0.9999	ns	>0.9999	ns	>0.9999	ns	>0.9999	ns	>0.9999	ns	>0.9999
14.6484	ns	>0.9999	ns	>0.9999	ns	>0.9999	ns	>0.9999	ns	>0.9999	ns	>0.9999	ns	>0.9999	ns	>0.9999
15.1367	ns	>0.9999	ns	>0.9999	ns	>0.9999	ns	>0.9999	ns	>0.9999	ns	>0.9999	ns	>0.9999	ns	>0.9999
15.625	ns	>0.9999	ns	>0.9999	ns	>0.9999	ns	>0.9999	ns	>0.9999	ns	>0.9999	ns	>0.9999	ns	>0.9999
16.1133	ns	>0.9999	ns	>0.9999	ns	>0.9999	ns	>0.9999	ns	>0.9999	ns	>0.9999	ns	>0.9999	ns	>0.9999
16.6016	ns	>0.9999	ns	>0.9999	ns	>0.9999	ns	>0.9999	ns	>0.9999	ns	>0.9999	ns	>0.9999	ns	>0.9999
17.0898	ns	>0.9999	ns	>0.9999	ns	>0.9999	ns	>0.9999	ns	>0.9999	ns	>0.9999	ns	>0.9999	ns	>0.9999
17.5781	ns	>0.9999	ns	>0.9999	ns	>0.9999	ns	>0.9999	ns	>0.9999	ns	>0.9999	ns	>0.9999	ns	>0.9999
18.0664	ns	>0.9999	ns	>0.9999	ns	>0.9999	ns	>0.9999	ns	>0.9999	ns	>0.9999	ns	>0.9999	ns	>0.9999
18.5547	ns	>0.9999	ns	>0.9999	ns	>0.9999	ns	>0.9999	ns	>0.9999	ns	>0.9999	ns	>0.9999	ns	>0.9999
19.043	ns	>0.9999	ns	>0.9999	ns	>0.9999	ns	>0.9999	ns	>0.9999	ns	>0.9999	ns	>0.9999	ns	>0.9999
19.5312	ns	>0.9999	ns	>0.9999	ns	>0.9999	ns	>0.9999	ns	>0.9999	ns	>0.9999	ns	>0.9999	ns	>0.9999
20.0195	ns	>0.9999	ns	>0.9999	ns	>0.9999	ns	>0.9999	ns	>0.9999	ns	>0.9999	ns	>0.9999	ns	>0.9999
20.5078	ns	>0.9999	ns	>0.9999	ns	>0.9999	ns	>0.9999	ns	>0.9999	ns	>0.9999	ns	>0.9999	ns	>0.9999
20.9961	ns	>0.9999	ns	>0.9999	ns	>0.9999	ns	>0.9999	ns	>0.9999	ns	>0.9999	ns	>0.9999	ns	>0.9999
21.4844	ns	>0.9999	ns	>0.9999	ns	>0.9999	ns	>0.9999	ns	>0.9999	ns	>0.9999	ns	>0.9999	ns	>0.9999
21.9727	ns	>0.9999	ns	>0.9999	ns	>0.9999	ns	>0.9999	ns	>0.9999	ns	>0.9999	ns	>0.9999	ns	>0.9999
22.4609	ns	>0.9999	ns	>0.9999	ns	>0.9999	ns	>0.9999	ns	>0.9999	ns	>0.9999	ns	>0.9999	ns	>0.9999
22.9492	ns	>0.9999	ns	>0.9999	ns	>0.9999	ns	>0.9999	ns	>0.9999	ns	>0.9999	ns	>0.9999	ns	>0.9999
23.4375	ns	>0.9999	ns	>0.9999	ns	>0.9999	ns	>0.9999	ns	>0.9999	ns	>0.9999	ns	>0.9999	ns	>0.9999
23.9258	ns	>0.9999	ns	>0.9999	ns	>0.9999	ns	>0.9999	ns	>0.9999	ns	>0.9999	ns	>0.9999	ns	>0.9999
24.4141	ns	>0.9999	ns	>0.9999	ns	>0.9999	ns	>0.9999	ns	>0.9999	ns	>0.9999	ns	>0.9999	ns	>0.9999
24.9023	ns	>0.9999	ns	>0.9999	ns	>0.9999	ns	>0.9999	ns	>0.9999	ns	>0.9999	ns	>0.9999	ns	>0.9999
25.3906	ns	>0.9999	ns	>0.9999	ns	>0.9999	ns	>0.9999	ns	>0.9999	ns	>0.9999	ns	>0.9999	ns	>0.9999
25.8789	ns	>0.9999	ns	>0.9999	ns	>0.9999	ns	>0.9999	ns	>0.9999	ns	>0.9999	ns	>0.9999	ns	>0.9999
26.3672	ns	>0.9999	ns	>0.9999	ns	>0.9999	ns	>0.9999	ns	>0.9999	ns	>0.9999	ns	>0.9999	ns	>0.9999
26.8555	ns	>0.9999	ns	>0.9999	ns	>0.9999	ns	>0.9999	ns	>0.9999	ns	>0.9999	ns	>0.9999	ns	>0.9999
27.3438	ns	>0.9999	ns	>0.9999	ns	>0.9999	ns	>0.9999	ns	>0.9999	ns	>0.9999	ns	>0.9999	ns	>0.9999
27.832	ns	>0.9999	ns	>0.9999	ns	>0.9999	ns	>0.9999	ns	>0.9999	ns	>0.9999	ns	>0.9999	ns	>0.9999
28.3203	ns	>0.9999	ns	>0.9999	ns	>0.9999	ns	>0.9999	ns	>0.9999	ns	>0.9999	ns	>0.9999	ns	>0.9999
28.8086	ns	>0.9999	ns	>0.9999	ns	>0.9999	ns	>0.9999	ns	>0.9999	ns	>0.9999	ns	>0.9999	ns	>0.9999
29.2969	ns	>0.9999	ns	>0.9999	ns	>0.9999	ns	>0.9999	ns	>0.9999	ns	>0.9999	ns	>0.9999	ns	>0.9999
29.7852	ns	>0.9999	ns	>0.9999	ns	>0.9999	ns	>0.9999	ns	>0.9999	ns	>0.9999	ns	>0.9999	ns	>0.9999
30.2734	ns	>0.9999	ns	>0.9999	ns	>0.9999	ns	>0.9999	ns	>0.9999	ns	>0.9999	ns	>0.9999	ns	>0.9999
30.7617	ns	>0.9999	ns	>0.9999	ns	>0.9999	ns	>0.9999	ns	>0.9999	ns	>0.9999	ns	>0.9999	ns	>0.9999
31.25	ns	>0.9999	ns	>0.9999	ns	>0.9999	ns	>0.9999	ns	>0.9999	ns	>0.9999	ns	>0.9999	ns	>0.9999
31.7383	ns	>0.9999	ns	>0.9999	ns	>0.9999	ns	>0.9999	ns	>0.9999	ns	>0.9999	ns	>0.9999	ns	>0.9999
32.2266	ns	>0.9999	ns	>0.9999	ns	>0.9999	ns	>0.9999	ns	>0.9999	ns	>0.9999	ns	>0.9999	ns	>0.9999
32.7148	ns	>0.9999	ns	>0.9999	ns	>0.9999	ns	>0.9999	ns	>0.9999	ns	>0.9999	ns	>0.9999	ns	>0.9999
33.2031	ns	>0.9999	ns	>0.9999	ns	>0.9999	ns	>0.9999	ns	>0.9999	ns	>0.9999	ns	>0.9999	ns	>0.9999
33.6914	ns	>0.9999	ns	>0.9999	ns	>0.9999	ns	>0.9999	ns	>0.9999	ns	>0.9999	ns	>0.9999	ns	>0.9999
34.1797	ns	>0.9999	ns	>0.9999	ns	>0.9999	ns	>0.9999	ns	>0.9999	ns	>0.9999	ns	>0.9999	ns	>0.9999
34.668	ns	>0.9999	ns	>0.9999	ns	>0.9999	ns	>0.9999	ns	>0.9999	ns	>0.9999	ns	>0.9999	ns	>0.9999
35.1562	ns	>0.9999	ns	>0.9999	ns	>0.9999	ns	>0.9999	ns	>0.9999	ns	>0.9999	ns	>0.9999	ns	>0.9999
35.6445	ns	>0.9999	ns	>0.9999	ns	>0.9999	ns	>0.9999	ns	>0.9999	ns	>0.9999	ns	>0.9999	ns	>0.9999
36.1328	ns	>0.9999	ns	>0.9999	ns	>0.9999	ns	>0.9999	ns	>0.9999	ns	>0.9999	ns	>0.9999	ns	>0.9999
36.6211	ns	>0.9999	ns	>0.9999	ns	>0.9999	ns	>0.9999	ns	>0.9999	ns	>0.9999	ns	>0.9999	ns	>0.9999
37.1094	ns	>0.9999	ns	>0.9999	ns	>0.9999	ns	>0.9999	ns	>0.9999	ns	>0.9999	ns	>0.9999	ns	>0.9999
37.5977	ns	>0.9999	ns	>0.9999	ns	>0.9999	ns	>0.9999	ns	>0.9999	ns	>0.9999	ns	>0.9999	ns	>0.9999
38.0859	ns	>0.9999	ns	>0.9999	ns	>0.9999	ns	>0.9999	ns	>0.9999	ns	>0.9999	ns	>0.9999	ns	>0.9999
38.5742	ns	>0.9999	ns	>0.9999	ns	>0.9999	ns	>0.9999	ns	>0.9999	ns	>0.9999	ns	>0.9999	ns	>0.9999
39.0625	ns	>0.9999	ns	>0.9999	ns	>0.9999	ns	>0.9999	ns	>0.9999	ns	>0.9999	ns	>0.9999	ns	>0.9999
39.5508	ns	>0.9999	ns	>0.9999	ns	>0.9999	ns	>0.9999	ns	>0.9999	ns	>0.9999	ns	>0.9999	ns	>0.9999
40.0391	ns	>0.9999	ns	>0.9999	ns	>0.9999	ns	>0.9999	ns	>0.9999	ns	>0.9999	ns	>0.9999	ns	>0.9999
40.5273	ns	>0.9999	ns	>0.9999	ns	>0.9999	ns	>0.9999	ns	>0.9999	ns	>0.9999	ns	>0.9999	ns	>0.9999
41.0156	ns	>0.9999	ns	>0.9999	ns	>0.9999	ns	>0.9999	ns	>0.9999	ns	>0.9999	ns	>0.9999	ns	>0.9999
41.5039	ns	>0.9999	ns	>0.9999	ns	>0.9999	ns	>0.9999	ns	>0.9999	ns	>0.9999	ns	>0.9999	ns	>0.9999
41.9922	ns	>0.9999	ns	>0.9999	ns	>0.9999	ns	>0.9999	ns	>0.9999	ns	>0.9999	ns	>0.9999	ns	>0.9999
42.4805	ns	>0.9999	ns	>0.9999	ns	>0.9999	ns	>0.9999	ns	>0.9999	ns	>0.9999	ns	>0.9999	ns	>0.9999
42.9688	ns	>0.9999	ns	>0.9999	ns	>0.9999	ns	>0.9999	ns	>0.9999	ns	>0.9999	ns	>0.9999	ns	>0.9999
43.457	ns	>0.9999	ns	>0.9999	ns	>0.9999	ns	>0.9999	ns	>0.9999	ns	>0.9999	ns	>0.9999	ns	>0.9999
43.9453	ns	>0.9999	ns	>0.9999	ns	>0.9999	ns	>0.9999	ns	>0.9999	ns	>0.9999	ns	>0.9999	ns	>0.9999
44.4336	ns	>0.9999	ns	>0.9999	ns	>0.9999	ns	>0.9999	ns	>0.9999	ns	>0.9999	ns	>0.9999	ns	>0.9999
44.9219	ns	>0.9999	ns	>0.9999	ns	>0.9999	ns	>0.9999	ns	>0.9999	ns	>0.9999	ns	>0.9999	ns	>0.9999
45.4102	ns	>0.9999	ns	>0.9999	ns	>0.9999	ns	>0.9999	ns	>0.9999	ns	>0.9999	ns	>0.9999	ns	>0.9999
45.8984	ns	>0.9999	ns	>0.9999	ns	>0.9999	ns	>0.9999	ns	>0.9999	ns	>0.9999	ns	>0.9999	ns	>0.9999
46.3867	ns	>0.9999	ns	>0.9999	ns	>0.9999	ns	>0.9999	ns	>0.9999	ns	>0.9999	ns	>0.9999	ns	>0.9999
46.875	ns	>0.9999	ns	>0.9999	ns	>0.9999	ns	>0.9999	ns	>0.9999	ns	>0.9999	ns	>0.9999	ns	>0.9999
47.3633	ns	>0.9999	ns	>0.9999	ns	>0.9999	ns	>0.9999	ns	>0.9999	ns	>0.9999	ns	>0.9999	ns	>0.9999
47.8516	ns	>0.9999	ns	>0.9999	ns	>0.9999	ns	>0.9999	ns	>0.9999	ns	>0.9999	ns	>0.9999	ns	>0.9999
48.3398	ns	>0.9999	ns	>0.9999	ns	>0.9999	ns	>0.9999	ns	>0.9999	ns	>0.9999	ns	>0.9999	ns	>0.9999
48.8281	ns	>0.9999	ns	>0.9999	ns	>0.9999	ns	>0.9999	ns	>0.9999	ns	>0.9999	ns	>0.9999	ns	>0.9999
49.3164	ns	>0.9999	ns	>0.9999	ns	>0.9999	ns	>0.9999	ns	>0.9999	ns	>0.9999	ns	>0.9999	ns	>0.9999
49.8047	ns	>0.9999	ns	>0.9999	ns	>0.9999	ns	>0.9999	ns	>0.9999	ns	>0.9999	ns	>0.9999	ns	>0.9999

## Sheet: SD_EE (related to Fig.2B)
AW				Tukey's multiple comparisons test					QW				Tukey's multiple comparisons test
Two-Way ANOVA									Two-Way ANOVA
	F (DFn, DFd)	P value	Freq. Bin	Comparison	Significance	Ad. P Value				F (DFn, DFd)	P value	Freq. Bin	Comparison	Significance	Ad. P Value
Interaction	F (303, 2385) = 5.489	P<0.0001	0.488281						Interaction	F (303, 2392) = 1.332	P=0.0003	0.488281
Freq	F (101, 2385) = 19.86	P<0.0001		SD(FP) vs. SD(FCb)	*	0.0337			Freq	F (101, 2392) = 4.952	P<0.0001		SD(FP) vs. SD(FCb)	ns	0.1002
Group	F (3, 2385) = 163.0	P<0.0001		SD(FP) vs. EE(FP)	ns	0.9878			group	F (3, 2392) = 132.8	P<0.0001		SD(FP) vs. EE(FP)	ns	0.289
Residual				SD(FP) vs. EE(FCb)	ns	0.5096							SD(FP) vs. EE(FCb)	ns	0.4579
				SD(FCb) vs. EE(FP)	*	0.0131							SD(FCb) vs. EE(FP)	***	0.0004
				SD(FCb) vs. EE(FCb)	ns	0.7182							SD(FCb) vs. EE(FCb)	**	0.0032
				EE(FP) vs. EE(FCb)	ns	0.3389							EE(FP) vs. EE(FCb)	ns	0.9998
			0.976563									0.976563
				SD(FP) vs. SD(FCb)	ns	0.4976							SD(FP) vs. SD(FCb)	**	0.0082
				SD(FP) vs. EE(FP)	ns	0.4515							SD(FP) vs. EE(FP)	ns	0.9998
				SD(FP) vs. EE(FCb)	ns	0.906							SD(FP) vs. EE(FCb)	ns	0.9724
				SD(FCb) vs. EE(FP)	*	0.0242							SD(FCb) vs. EE(FP)	**	0.0062
				SD(FCb) vs. EE(FCb)	ns	0.2288							SD(FCb) vs. EE(FCb)	**	0.0068
				EE(FP) vs. EE(FCb)	ns	0.926							EE(FP) vs. EE(FCb)	ns	0.9843
			1.46484									1.46484
				SD(FP) vs. SD(FCb)	ns	0.6104							SD(FP) vs. SD(FCb)	*	0.0475
				SD(FP) vs. EE(FP)	ns	0.114							SD(FP) vs. EE(FP)	ns	0.6911
				SD(FP) vs. EE(FCb)	ns	0.2686							SD(FP) vs. EE(FCb)	ns	0.2495
				SD(FCb) vs. EE(FP)	**	0.004							SD(FCb) vs. EE(FP)	**	0.0015
				SD(FCb) vs. EE(FCb)	*	0.0231							SD(FCb) vs. EE(FCb)	***	0.0003
				EE(FP) vs. EE(FCb)	ns	0.9988							EE(FP) vs. EE(FCb)	ns	0.8105
			1.95312									1.95312
				SD(FP) vs. SD(FCb)	ns	0.7354							SD(FP) vs. SD(FCb)	ns	0.1637
				SD(FP) vs. EE(FP)	ns	0.1806							SD(FP) vs. EE(FP)	ns	0.8139
				SD(FP) vs. EE(FCb)	ns	0.4327							SD(FP) vs. EE(FCb)	ns	0.1028
				SD(FCb) vs. EE(FP)	*	0.0156							SD(FCb) vs. EE(FP)	*	0.0185
				SD(FCb) vs. EE(FCb)	ns	0.0825							SD(FCb) vs. EE(FCb)	***	0.0003
				EE(FP) vs. EE(FCb)	ns	0.9936							EE(FP) vs. EE(FCb)	ns	0.4336
			2.44141									2.44141
				SD(FP) vs. SD(FCb)	ns	0.9595							SD(FP) vs. SD(FCb)	ns	0.4673
				SD(FP) vs. EE(FP)	ns	0.298							SD(FP) vs. EE(FP)	ns	0.7696
				SD(FP) vs. EE(FCb)	ns	0.1599							SD(FP) vs. EE(FCb)	ns	0.1049
				SD(FCb) vs. EE(FP)	ns	0.1266							SD(FCb) vs. EE(FP)	ns	0.0805
				SD(FCb) vs. EE(FCb)	ns	0.0657							SD(FCb) vs. EE(FCb)	**	0.0027
				EE(FP) vs. EE(FCb)	ns	0.9479							EE(FP) vs. EE(FCb)	ns	0.4832
			2.92969									2.92969
				SD(FP) vs. SD(FCb)	ns	0.8651							SD(FP) vs. SD(FCb)	ns	0.6105
				SD(FP) vs. EE(FP)	ns	0.4226							SD(FP) vs. EE(FP)	ns	0.9107
				SD(FP) vs. EE(FCb)	ns	0.1111							SD(FP) vs. EE(FCb)	ns	0.2475
				SD(FCb) vs. EE(FP)	ns	0.1103							SD(FCb) vs. EE(FP)	ns	0.2426
				SD(FCb) vs. EE(FCb)	*	0.0213							SD(FCb) vs. EE(FCb)	*	0.0203
				EE(FP) vs. EE(FCb)	ns	0.7998							EE(FP) vs. EE(FCb)	ns	0.5797
			3.41797									3.41797
				SD(FP) vs. SD(FCb)	ns	0.9337							SD(FP) vs. SD(FCb)	ns	0.973
				SD(FP) vs. EE(FP)	ns	0.2575							SD(FP) vs. EE(FP)	ns	0.4709
				SD(FP) vs. EE(FCb)	ns	0.1086							SD(FP) vs. EE(FCb)	**	0.008
				SD(FCb) vs. EE(FP)	ns	0.0838							SD(FCb) vs. EE(FP)	ns	0.2601
				SD(FCb) vs. EE(FCb)	*	0.033							SD(FCb) vs. EE(FCb)	**	0.0028
				EE(FP) vs. EE(FCb)	ns	0.9162							EE(FP) vs. EE(FCb)	ns	0.2209
			3.90625									3.90625
				SD(FP) vs. SD(FCb)	ns	0.9915							SD(FP) vs. SD(FCb)	ns	0.9222
				SD(FP) vs. EE(FP)	ns	0.0876							SD(FP) vs. EE(FP)	ns	0.4995
				SD(FP) vs. EE(FCb)	ns	0.1164							SD(FP) vs. EE(FCb)	**	0.0077
				SD(FCb) vs. EE(FP)	ns	0.0516							SD(FCb) vs. EE(FP)	ns	0.1947
				SD(FCb) vs. EE(FCb)	ns	0.0729							SD(FCb) vs. EE(FCb)	**	0.0014
				EE(FP) vs. EE(FCb)	ns	0.9984							EE(FP) vs. EE(FCb)	ns	0.2
			4.39453									4.39453
				SD(FP) vs. SD(FCb)	ns	>0.9999							SD(FP) vs. SD(FCb)	ns	0.8515
				SD(FP) vs. EE(FP)	ns	0.1429							SD(FP) vs. EE(FP)	ns	0.5155
				SD(FP) vs. EE(FCb)	*	0.0276							SD(FP) vs. EE(FCb)	*	0.0146
				SD(FCb) vs. EE(FP)	ns	0.1581							SD(FCb) vs. EE(FP)	ns	0.1426
				SD(FCb) vs. EE(FCb)	*	0.032							SD(FCb) vs. EE(FCb)	**	0.0016
				EE(FP) vs. EE(FCb)	ns	0.7973							EE(FP) vs. EE(FCb)	ns	0.2774
			4.88281									4.88281
				SD(FP) vs. SD(FCb)	ns	0.9391							SD(FP) vs. SD(FCb)	ns	0.8108
				SD(FP) vs. EE(FP)	ns	0.588							SD(FP) vs. EE(FP)	ns	0.6005
				SD(FP) vs. EE(FCb)	ns	0.1109							SD(FP) vs. EE(FCb)	*	0.0344
				SD(FCb) vs. EE(FP)	ns	0.9185							SD(FCb) vs. EE(FP)	ns	0.1573
				SD(FCb) vs. EE(FCb)	ns	0.3351							SD(FCb) vs. EE(FCb)	**	0.0035
				EE(FP) vs. EE(FCb)	ns	0.6635							EE(FP) vs. EE(FCb)	ns	0.3678
			5.37109									5.37109
				SD(FP) vs. SD(FCb)	ns	0.9732							SD(FP) vs. SD(FCb)	ns	0.8115
				SD(FP) vs. EE(FP)	ns	0.8443							SD(FP) vs. EE(FP)	ns	0.8766
				SD(FP) vs. EE(FCb)	ns	0.066							SD(FP) vs. EE(FCb)	*	0.0327
				SD(FCb) vs. EE(FP)	ns	0.9836							SD(FCb) vs. EE(FP)	ns	0.3719
				SD(FCb) vs. EE(FCb)	ns	0.1817							SD(FCb) vs. EE(FCb)	**	0.0033
				EE(FP) vs. EE(FCb)	ns	0.3018							EE(FP) vs. EE(FCb)	ns	0.1638
			5.85938									5.85938
				SD(FP) vs. SD(FCb)	ns	0.8255							SD(FP) vs. SD(FCb)	ns	0.9976
				SD(FP) vs. EE(FP)	ns	0.9644							SD(FP) vs. EE(FP)	ns	>0.9999
				SD(FP) vs. EE(FCb)	ns	0.1269							SD(FP) vs. EE(FCb)	ns	0.1713
				SD(FCb) vs. EE(FP)	ns	0.9783							SD(FCb) vs. EE(FP)	ns	0.9967
				SD(FCb) vs. EE(FCb)	ns	0.5184							SD(FCb) vs. EE(FCb)	ns	0.1347
				EE(FP) vs. EE(FCb)	ns	0.2878							EE(FP) vs. EE(FCb)	ns	0.1778
			6.34766									6.34766
				SD(FP) vs. SD(FCb)	ns	0.8158							SD(FP) vs. SD(FCb)	ns	0.8841
				SD(FP) vs. EE(FP)	ns	0.7493							SD(FP) vs. EE(FP)	ns	0.9574
				SD(FP) vs. EE(FCb)	ns	0.3869							SD(FP) vs. EE(FCb)	ns	0.4348
				SD(FCb) vs. EE(FP)	ns	0.2524							SD(FCb) vs. EE(FP)	ns	0.6127
				SD(FCb) vs. EE(FCb)	ns	0.8693							SD(FCb) vs. EE(FCb)	ns	0.8462
				EE(FP) vs. EE(FCb)	ns	0.0661							EE(FP) vs. EE(FCb)	ns	0.2078
			6.83594									6.83594
				SD(FP) vs. SD(FCb)	ns	0.6264							SD(FP) vs. SD(FCb)	ns	0.893
				SD(FP) vs. EE(FP)	ns	0.5752							SD(FP) vs. EE(FP)	ns	0.9798
				SD(FP) vs. EE(FCb)	ns	0.2655							SD(FP) vs. EE(FCb)	ns	0.3162
				SD(FCb) vs. EE(FP)	ns	0.0703							SD(FCb) vs. EE(FP)	ns	0.697
				SD(FCb) vs. EE(FCb)	ns	0.8941							SD(FCb) vs. EE(FCb)	ns	0.7251
				EE(FP) vs. EE(FCb)	*	0.0174							EE(FP) vs. EE(FCb)	ns	0.1677
			7.32422									7.32422
				SD(FP) vs. SD(FCb)	ns	0.5811							SD(FP) vs. SD(FCb)	ns	0.958
				SD(FP) vs. EE(FP)	ns	0.5633							SD(FP) vs. EE(FP)	ns	0.9988
				SD(FP) vs. EE(FCb)	ns	0.3355							SD(FP) vs. EE(FCb)	ns	0.5565
				SD(FCb) vs. EE(FP)	ns	0.0561							SD(FCb) vs. EE(FP)	ns	0.9839
				SD(FCb) vs. EE(FCb)	ns	0.9568							SD(FCb) vs. EE(FCb)	ns	0.8405
				EE(FP) vs. EE(FCb)	*	0.0251							EE(FP) vs. EE(FCb)	ns	0.6397
			7.8125									7.8125
				SD(FP) vs. SD(FCb)	ns	0.8942							SD(FP) vs. SD(FCb)	ns	0.9606
				SD(FP) vs. EE(FP)	ns	0.997							SD(FP) vs. EE(FP)	ns	0.2599
				SD(FP) vs. EE(FCb)	ns	0.764							SD(FP) vs. EE(FCb)	ns	0.7556
				SD(FCb) vs. EE(FP)	ns	0.9565							SD(FCb) vs. EE(FP)	ns	0.1078
				SD(FCb) vs. EE(FCb)	ns	0.9883							SD(FCb) vs. EE(FCb)	ns	0.4999
				EE(FP) vs. EE(FCb)	ns	0.8563							EE(FP) vs. EE(FCb)	ns	0.9274
			8.30078									8.30078
				SD(FP) vs. SD(FCb)	ns	0.9197							SD(FP) vs. SD(FCb)	ns	0.3652
				SD(FP) vs. EE(FP)	****	<0.0001							SD(FP) vs. EE(FP)	****	<0.0001
				SD(FP) vs. EE(FCb)	ns	0.4297							SD(FP) vs. EE(FCb)	ns	0.8215
				SD(FCb) vs. EE(FP)	****	<0.0001							SD(FCb) vs. EE(FP)	****	<0.0001
				SD(FCb) vs. EE(FCb)	ns	0.1747							SD(FCb) vs. EE(FCb)	ns	0.1029
				EE(FP) vs. EE(FCb)	**	0.0042							EE(FP) vs. EE(FCb)	**	0.0043
			8.78906									8.78906
				SD(FP) vs. SD(FCb)	ns	0.1341							SD(FP) vs. SD(FCb)	ns	0.2385
				SD(FP) vs. EE(FP)	****	<0.0001							SD(FP) vs. EE(FP)	****	<0.0001
				SD(FP) vs. EE(FCb)	ns	0.1982							SD(FP) vs. EE(FCb)	ns	0.2653
				SD(FCb) vs. EE(FP)	****	<0.0001							SD(FCb) vs. EE(FP)	****	<0.0001
				SD(FCb) vs. EE(FCb)	***	0.0007							SD(FCb) vs. EE(FCb)	**	0.0035
				EE(FP) vs. EE(FCb)	****	<0.0001							EE(FP) vs. EE(FCb)	****	<0.0001
			9.27734									9.27734
				SD(FP) vs. SD(FCb)	*	0.0433							SD(FP) vs. SD(FCb)	ns	0.1886
				SD(FP) vs. EE(FP)	****	<0.0001							SD(FP) vs. EE(FP)	****	<0.0001
				SD(FP) vs. EE(FCb)	ns	0.1595							SD(FP) vs. EE(FCb)	ns	0.0627
				SD(FCb) vs. EE(FP)	****	<0.0001							SD(FCb) vs. EE(FP)	****	<0.0001
				SD(FCb) vs. EE(FCb)	****	<0.0001							SD(FCb) vs. EE(FCb)	***	0.0002
				EE(FP) vs. EE(FCb)	****	<0.0001							EE(FP) vs. EE(FCb)	**	0.0026
			9.76562									9.76562
				SD(FP) vs. SD(FCb)	ns	0.0561							SD(FP) vs. SD(FCb)	ns	0.1587
				SD(FP) vs. EE(FP)	****	<0.0001							SD(FP) vs. EE(FP)	***	0.0006
				SD(FP) vs. EE(FCb)	ns	0.0541							SD(FP) vs. EE(FCb)	ns	0.4541
				SD(FCb) vs. EE(FP)	****	<0.0001							SD(FCb) vs. EE(FP)	****	<0.0001
				SD(FCb) vs. EE(FCb)	****	<0.0001							SD(FCb) vs. EE(FCb)	**	0.0059
				EE(FP) vs. EE(FCb)	****	<0.0001							EE(FP) vs. EE(FCb)	ns	0.2188
			10.2539									10.2539
				SD(FP) vs. SD(FCb)	ns	0.8767							SD(FP) vs. SD(FCb)	ns	0.214
				SD(FP) vs. EE(FP)	****	<0.0001							SD(FP) vs. EE(FP)	ns	0.2164
				SD(FP) vs. EE(FCb)	*	0.014							SD(FP) vs. EE(FCb)	ns	0.5749
				SD(FCb) vs. EE(FP)	****	<0.0001							SD(FCb) vs. EE(FP)	***	0.0009
				SD(FCb) vs. EE(FCb)	**	0.0019							SD(FCb) vs. EE(FCb)	*	0.0165
				EE(FP) vs. EE(FCb)	****	<0.0001							EE(FP) vs. EE(FCb)	ns	0.9768
			10.7422									10.7422
				SD(FP) vs. SD(FCb)	ns	0.8426							SD(FP) vs. SD(FCb)	ns	0.7934
				SD(FP) vs. EE(FP)	****	<0.0001							SD(FP) vs. EE(FP)	ns	0.3797
				SD(FP) vs. EE(FCb)	**	0.0043							SD(FP) vs. EE(FCb)	ns	0.7986
				SD(FCb) vs. EE(FP)	****	<0.0001							SD(FCb) vs. EE(FP)	ns	0.0657
				SD(FCb) vs. EE(FCb)	***	0.0004							SD(FCb) vs. EE(FCb)	ns	0.3228
				EE(FP) vs. EE(FCb)	*	0.0333							EE(FP) vs. EE(FCb)	ns	0.9613
			11.2305									11.2305
				SD(FP) vs. SD(FCb)	ns	0.7449							SD(FP) vs. SD(FCb)	ns	0.8639
				SD(FP) vs. EE(FP)	****	<0.0001							SD(FP) vs. EE(FP)	ns	0.85
				SD(FP) vs. EE(FCb)	ns	0.1657							SD(FP) vs. EE(FCb)	ns	0.3591
				SD(FCb) vs. EE(FP)	****	<0.0001							SD(FCb) vs. EE(FP)	ns	0.4011
				SD(FCb) vs. EE(FCb)	*	0.0197							SD(FCb) vs. EE(FCb)	ns	0.1029
				EE(FP) vs. EE(FCb)	ns	0.2896							EE(FP) vs. EE(FCb)	ns	0.7915
			11.7188									11.7188
				SD(FP) vs. SD(FCb)	ns	0.9674							SD(FP) vs. SD(FCb)	ns	0.4323
				SD(FP) vs. EE(FP)	**	0.0022							SD(FP) vs. EE(FP)	ns	0.9114
				SD(FP) vs. EE(FCb)	ns	0.1588							SD(FP) vs. EE(FCb)	ns	0.9233
				SD(FCb) vs. EE(FP)	***	0.0006							SD(FCb) vs. EE(FP)	ns	0.8207
				SD(FCb) vs. EE(FCb)	ns	0.0707							SD(FCb) vs. EE(FCb)	ns	0.2098
				EE(FP) vs. EE(FCb)	ns	0.7321							EE(FP) vs. EE(FCb)	ns	0.6219
			12.207									12.207
				SD(FP) vs. SD(FCb)	ns	0.6635							SD(FP) vs. SD(FCb)	ns	0.7247
				SD(FP) vs. EE(FP)	ns	0.1374							SD(FP) vs. EE(FP)	ns	0.9982
				SD(FP) vs. EE(FCb)	ns	0.3036							SD(FP) vs. EE(FCb)	ns	0.9083
				SD(FCb) vs. EE(FP)	**	0.0071							SD(FCb) vs. EE(FP)	ns	0.6223
				SD(FCb) vs. EE(FCb)	*	0.0349							SD(FCb) vs. EE(FCb)	ns	0.3938
				EE(FP) vs. EE(FCb)	ns	0.9989							EE(FP) vs. EE(FCb)	ns	0.9542
			12.6953									12.6953
				SD(FP) vs. SD(FCb)	ns	0.7788							SD(FP) vs. SD(FCb)	ns	0.9812
				SD(FP) vs. EE(FP)	ns	0.3867							SD(FP) vs. EE(FP)	ns	0.9949
				SD(FP) vs. EE(FCb)	ns	0.8833							SD(FP) vs. EE(FCb)	ns	0.9504
				SD(FCb) vs. EE(FP)	ns	0.0632							SD(FCb) vs. EE(FP)	ns	0.9267
				SD(FCb) vs. EE(FCb)	ns	0.406							SD(FCb) vs. EE(FCb)	ns	0.8266
				EE(FP) vs. EE(FCb)	ns	0.9132							EE(FP) vs. EE(FCb)	ns	0.9886
			13.1836									13.1836
				SD(FP) vs. SD(FCb)	ns	0.9957							SD(FP) vs. SD(FCb)	ns	0.8159
				SD(FP) vs. EE(FP)	ns	0.356							SD(FP) vs. EE(FP)	ns	0.9956
				SD(FP) vs. EE(FCb)	ns	0.7548							SD(FP) vs. EE(FCb)	ns	0.9447
				SD(FCb) vs. EE(FP)	ns	0.266							SD(FCb) vs. EE(FP)	ns	0.6876
				SD(FCb) vs. EE(FCb)	ns	0.6467							SD(FCb) vs. EE(FCb)	ns	0.551
				EE(FP) vs. EE(FCb)	ns	0.97							EE(FP) vs. EE(FCb)	ns	0.9849
			13.6719									13.6719
				SD(FP) vs. SD(FCb)	ns	0.9867							SD(FP) vs. SD(FCb)	ns	0.9909
				SD(FP) vs. EE(FP)	ns	0.8113							SD(FP) vs. EE(FP)	ns	0.8961
				SD(FP) vs. EE(FCb)	ns	0.8597							SD(FP) vs. EE(FCb)	ns	0.7257
				SD(FCb) vs. EE(FP)	ns	0.6294							SD(FCb) vs. EE(FP)	ns	0.7635
				SD(FCb) vs. EE(FCb)	ns	0.7098							SD(FCb) vs. EE(FCb)	ns	0.5789
				EE(FP) vs. EE(FCb)	ns	>0.9999							EE(FP) vs. EE(FCb)	ns	0.9744
			14.1602									14.1602
				SD(FP) vs. SD(FCb)	ns	0.9969							SD(FP) vs. SD(FCb)	ns	0.7567
				SD(FP) vs. EE(FP)	ns	0.8809							SD(FP) vs. EE(FP)	ns	0.9659
				SD(FP) vs. EE(FCb)	ns	0.874							SD(FP) vs. EE(FCb)	ns	0.6127
				SD(FCb) vs. EE(FP)	ns	0.7934							SD(FCb) vs. EE(FP)	ns	0.9507
				SD(FCb) vs. EE(FCb)	ns	0.7948							SD(FCb) vs. EE(FCb)	ns	0.9889
				EE(FP) vs. EE(FCb)	ns	0.9996							EE(FP) vs. EE(FCb)	ns	0.8493
			14.6484									14.6484
				SD(FP) vs. SD(FCb)	ns	0.9992							SD(FP) vs. SD(FCb)	ns	0.8758
				SD(FP) vs. EE(FP)	ns	>0.9999							SD(FP) vs. EE(FP)	ns	0.8297
				SD(FP) vs. EE(FCb)	ns	0.9656							SD(FP) vs. EE(FCb)	ns	0.8941
				SD(FCb) vs. EE(FP)	ns	0.9988							SD(FCb) vs. EE(FP)	ns	0.3933
				SD(FCb) vs. EE(FCb)	ns	0.9864							SD(FCb) vs. EE(FCb)	ns	0.5286
				EE(FP) vs. EE(FCb)	ns	0.9623							EE(FP) vs. EE(FCb)	ns	>0.9999
			15.1367									15.1367
				SD(FP) vs. SD(FCb)	ns	0.9995							SD(FP) vs. SD(FCb)	ns	0.9339
				SD(FP) vs. EE(FP)	ns	0.9969							SD(FP) vs. EE(FP)	ns	0.3945
				SD(FP) vs. EE(FCb)	ns	0.9981							SD(FP) vs. EE(FCb)	ns	0.9002
				SD(FCb) vs. EE(FP)	ns	0.9899							SD(FCb) vs. EE(FP)	ns	0.149
				SD(FCb) vs. EE(FCb)	ns	0.9933							SD(FCb) vs. EE(FCb)	ns	0.6276
				EE(FP) vs. EE(FCb)	ns	>0.9999							EE(FP) vs. EE(FCb)	ns	0.9019
			15.625									15.625
				SD(FP) vs. SD(FCb)	ns	0.9033							SD(FP) vs. SD(FCb)	ns	0.9504
				SD(FP) vs. EE(FP)	ns	0.9979							SD(FP) vs. EE(FP)	ns	0.5205
				SD(FP) vs. EE(FCb)	ns	0.9637							SD(FP) vs. EE(FCb)	ns	0.9386
				SD(FCb) vs. EE(FP)	ns	0.9571							SD(FCb) vs. EE(FP)	ns	0.2477
				SD(FCb) vs. EE(FCb)	ns	0.9991							SD(FCb) vs. EE(FCb)	ns	0.7281
				EE(FP) vs. EE(FCb)	ns	0.9887							EE(FP) vs. EE(FCb)	ns	0.9256
			16.1133									16.1133
				SD(FP) vs. SD(FCb)	ns	0.8953							SD(FP) vs. SD(FCb)	ns	0.9913
				SD(FP) vs. EE(FP)	ns	0.8695							SD(FP) vs. EE(FP)	ns	0.3512
				SD(FP) vs. EE(FCb)	ns	0.992							SD(FP) vs. EE(FCb)	ns	0.9994
				SD(FCb) vs. EE(FP)	ns	0.4713							SD(FCb) vs. EE(FP)	ns	0.5625
				SD(FCb) vs. EE(FCb)	ns	0.9858							SD(FCb) vs. EE(FCb)	ns	0.9818
				EE(FP) vs. EE(FCb)	ns	0.7741							EE(FP) vs. EE(FCb)	ns	0.3976
			16.6016									16.6016
				SD(FP) vs. SD(FCb)	ns	0.9279							SD(FP) vs. SD(FCb)	ns	0.9849
				SD(FP) vs. EE(FP)	**	0.0063							SD(FP) vs. EE(FP)	ns	0.2541
				SD(FP) vs. EE(FCb)	ns	0.7243							SD(FP) vs. EE(FCb)	ns	0.6148
				SD(FCb) vs. EE(FP)	**	0.001							SD(FCb) vs. EE(FP)	ns	0.4833
				SD(FCb) vs. EE(FCb)	ns	0.4035							SD(FCb) vs. EE(FCb)	ns	0.8181
				EE(FP) vs. EE(FCb)	ns	0.2681							EE(FP) vs. EE(FCb)	ns	0.9789
			17.0898									17.0898
				SD(FP) vs. SD(FCb)	ns	0.9542							SD(FP) vs. SD(FCb)	ns	0.9623
				SD(FP) vs. EE(FP)	****	<0.0001							SD(FP) vs. EE(FP)	ns	0.0786
				SD(FP) vs. EE(FCb)	ns	0.999							SD(FP) vs. EE(FCb)	ns	0.6221
				SD(FCb) vs. EE(FP)	****	<0.0001							SD(FCb) vs. EE(FP)	*	0.0266
				SD(FCb) vs. EE(FCb)	ns	0.9884							SD(FCb) vs. EE(FCb)	ns	0.376
				EE(FP) vs. EE(FCb)	***	0.0001							EE(FP) vs. EE(FCb)	ns	0.8093
			17.5781									17.5781
				SD(FP) vs. SD(FCb)	ns	0.9339							SD(FP) vs. SD(FCb)	ns	0.9999
				SD(FP) vs. EE(FP)	****	<0.0001							SD(FP) vs. EE(FP)	ns	0.0853
				SD(FP) vs. EE(FCb)	ns	0.6705							SD(FP) vs. EE(FCb)	ns	0.5966
				SD(FCb) vs. EE(FP)	****	<0.0001							SD(FCb) vs. EE(FP)	ns	0.0869
				SD(FCb) vs. EE(FCb)	ns	0.364							SD(FCb) vs. EE(FCb)	ns	0.5768
				EE(FP) vs. EE(FCb)	***	0.0001							EE(FP) vs. EE(FCb)	ns	0.844
			18.0664									18.0664
				SD(FP) vs. SD(FCb)	ns	0.3717							SD(FP) vs. SD(FCb)	ns	0.9996
				SD(FP) vs. EE(FP)	****	<0.0001							SD(FP) vs. EE(FP)	ns	0.1055
				SD(FP) vs. EE(FCb)	ns	0.9178							SD(FP) vs. EE(FCb)	ns	0.4316
				SD(FCb) vs. EE(FP)	****	<0.0001							SD(FCb) vs. EE(FP)	ns	0.1561
				SD(FCb) vs. EE(FCb)	ns	0.1694							SD(FCb) vs. EE(FCb)	ns	0.5115
				EE(FP) vs. EE(FCb)	****	<0.0001							EE(FP) vs. EE(FCb)	ns	0.9634
			18.5547									18.5547
				SD(FP) vs. SD(FCb)	ns	0.9285							SD(FP) vs. SD(FCb)	ns	0.9789
				SD(FP) vs. EE(FP)	****	<0.0001							SD(FP) vs. EE(FP)	ns	0.2024
				SD(FP) vs. EE(FCb)	ns	>0.9999							SD(FP) vs. EE(FCb)	ns	0.2491
				SD(FCb) vs. EE(FP)	****	<0.0001							SD(FCb) vs. EE(FP)	ns	0.0999
				SD(FCb) vs. EE(FCb)	ns	0.9568							SD(FCb) vs. EE(FCb)	ns	0.1366
				EE(FP) vs. EE(FCb)	****	<0.0001							EE(FP) vs. EE(FCb)	ns	0.9992
			19.043									19.043
				SD(FP) vs. SD(FCb)	ns	0.9956							SD(FP) vs. SD(FCb)	ns	0.979
				SD(FP) vs. EE(FP)	****	<0.0001							SD(FP) vs. EE(FP)	ns	0.2113
				SD(FP) vs. EE(FCb)	ns	0.7416							SD(FP) vs. EE(FCb)	ns	0.2584
				SD(FCb) vs. EE(FP)	****	<0.0001							SD(FCb) vs. EE(FP)	ns	0.1052
				SD(FCb) vs. EE(FCb)	ns	0.8538							SD(FCb) vs. EE(FCb)	ns	0.1428
				EE(FP) vs. EE(FCb)	**	0.0078							EE(FP) vs. EE(FCb)	ns	0.9992
			19.5312									19.5312
				SD(FP) vs. SD(FCb)	ns	0.7258							SD(FP) vs. SD(FCb)	ns	0.9983
				SD(FP) vs. EE(FP)	*	0.0298							SD(FP) vs. EE(FP)	ns	0.2293
				SD(FP) vs. EE(FCb)	ns	0.9695							SD(FP) vs. EE(FCb)	ns	0.3322
				SD(FCb) vs. EE(FP)	***	0.0007							SD(FCb) vs. EE(FP)	ns	0.1873
				SD(FCb) vs. EE(FCb)	ns	0.4993							SD(FCb) vs. EE(FCb)	ns	0.2787
				EE(FP) vs. EE(FCb)	ns	0.1729							EE(FP) vs. EE(FCb)	ns	>0.9999
			20.0195									20.0195
				SD(FP) vs. SD(FCb)	ns	0.9771							SD(FP) vs. SD(FCb)	ns	>0.9999
				SD(FP) vs. EE(FP)	ns	0.0813							SD(FP) vs. EE(FP)	ns	0.2614
				SD(FP) vs. EE(FCb)	ns	0.9855							SD(FP) vs. EE(FCb)	ns	0.1668
				SD(FCb) vs. EE(FP)	*	0.0345							SD(FCb) vs. EE(FP)	ns	0.2647
				SD(FCb) vs. EE(FCb)	ns	>0.9999							SD(FCb) vs. EE(FCb)	ns	0.1688
				EE(FP) vs. EE(FCb)	ns	0.0709							EE(FP) vs. EE(FCb)	ns	0.968
			20.5078									20.5078
				SD(FP) vs. SD(FCb)	ns	0.9985							SD(FP) vs. SD(FCb)	ns	0.9978
				SD(FP) vs. EE(FP)	ns	0.0998							SD(FP) vs. EE(FP)	ns	0.3311
				SD(FP) vs. EE(FCb)	ns	0.9998							SD(FP) vs. EE(FCb)	ns	0.1842
				SD(FCb) vs. EE(FP)	ns	0.1449							SD(FCb) vs. EE(FP)	ns	0.2677
				SD(FCb) vs. EE(FCb)	ns	>0.9999							SD(FCb) vs. EE(FCb)	ns	0.1472
				EE(FP) vs. EE(FCb)	ns	0.1894							EE(FP) vs. EE(FCb)	ns	0.9514
			20.9961									20.9961
				SD(FP) vs. SD(FCb)	ns	0.9788							SD(FP) vs. SD(FCb)	ns	0.9905
				SD(FP) vs. EE(FP)	ns	0.5121							SD(FP) vs. EE(FP)	ns	0.8282
				SD(FP) vs. EE(FCb)	ns	0.9935							SD(FP) vs. EE(FCb)	ns	0.2868
				SD(FCb) vs. EE(FP)	ns	0.2784							SD(FCb) vs. EE(FP)	ns	0.6727
				SD(FCb) vs. EE(FCb)	ns	0.9997							SD(FCb) vs. EE(FCb)	ns	0.191
				EE(FP) vs. EE(FCb)	ns	0.4223							EE(FP) vs. EE(FCb)	ns	0.7359
			21.4844									21.4844
				SD(FP) vs. SD(FCb)	ns	0.9318							SD(FP) vs. SD(FCb)	ns	>0.9999
				SD(FP) vs. EE(FP)	ns	0.6338							SD(FP) vs. EE(FP)	ns	0.7728
				SD(FP) vs. EE(FCb)	ns	0.8801							SD(FP) vs. EE(FCb)	ns	0.1548
				SD(FCb) vs. EE(FP)	ns	0.269							SD(FCb) vs. EE(FP)	ns	0.8028
				SD(FCb) vs. EE(FCb)	ns	0.9974							SD(FCb) vs. EE(FCb)	ns	0.1808
				EE(FP) vs. EE(FCb)	ns	0.254							EE(FP) vs. EE(FCb)	ns	0.5922
			21.9727									21.9727
				SD(FP) vs. SD(FCb)	ns	0.9993							SD(FP) vs. SD(FCb)	ns	>0.9999
				SD(FP) vs. EE(FP)	ns	0.3883							SD(FP) vs. EE(FP)	ns	0.793
				SD(FP) vs. EE(FCb)	ns	0.9916							SD(FP) vs. EE(FCb)	ns	0.4455
				SD(FCb) vs. EE(FP)	ns	0.3166							SD(FCb) vs. EE(FP)	ns	0.8397
				SD(FCb) vs. EE(FCb)	ns	0.9981							SD(FCb) vs. EE(FCb)	ns	0.5027
				EE(FP) vs. EE(FCb)	ns	0.3058							EE(FP) vs. EE(FCb)	ns	0.9054
			22.4609									22.4609
				SD(FP) vs. SD(FCb)	ns	0.9973							SD(FP) vs. SD(FCb)	ns	>0.9999
				SD(FP) vs. EE(FP)	ns	0.8483							SD(FP) vs. EE(FP)	ns	0.6725
				SD(FP) vs. EE(FCb)	ns	0.9953							SD(FP) vs. EE(FCb)	ns	0.3089
				SD(FCb) vs. EE(FP)	ns	0.7397							SD(FCb) vs. EE(FP)	ns	0.7178
				SD(FCb) vs. EE(FCb)	ns	>0.9999							SD(FCb) vs. EE(FCb)	ns	0.3499
				EE(FP) vs. EE(FCb)	ns	0.7594							EE(FP) vs. EE(FCb)	ns	0.881
			22.9492									22.9492
				SD(FP) vs. SD(FCb)	ns	0.883							SD(FP) vs. SD(FCb)	ns	0.9903
				SD(FP) vs. EE(FP)	ns	0.9985							SD(FP) vs. EE(FP)	ns	0.9219
				SD(FP) vs. EE(FCb)	ns	0.6914							SD(FP) vs. EE(FCb)	ns	0.3564
				SD(FCb) vs. EE(FP)	ns	0.9328							SD(FCb) vs. EE(FP)	ns	0.7807
				SD(FCb) vs. EE(FCb)	ns	0.9741							SD(FCb) vs. EE(FCb)	ns	0.2212
				EE(FP) vs. EE(FCb)	ns	0.7608							EE(FP) vs. EE(FCb)	ns	0.6827
			23.4375									23.4375
				SD(FP) vs. SD(FCb)	ns	>0.9999							SD(FP) vs. SD(FCb)	ns	0.9922
				SD(FP) vs. EE(FP)	ns	0.9598							SD(FP) vs. EE(FP)	ns	0.8939
				SD(FP) vs. EE(FCb)	ns	0.9452							SD(FP) vs. EE(FCb)	ns	0.6289
				SD(FCb) vs. EE(FP)	ns	0.9598							SD(FCb) vs. EE(FP)	ns	0.7497
				SD(FCb) vs. EE(FCb)	ns	0.9452							SD(FCb) vs. EE(FCb)	ns	0.4656
				EE(FP) vs. EE(FCb)	ns	0.7372							EE(FP) vs. EE(FCb)	ns	0.9362
			23.9258									23.9258
				SD(FP) vs. SD(FCb)	ns	0.999							SD(FP) vs. SD(FCb)	ns	0.9238
				SD(FP) vs. EE(FP)	ns	0.8981							SD(FP) vs. EE(FP)	ns	0.8178
				SD(FP) vs. EE(FCb)	ns	0.9127							SD(FP) vs. EE(FCb)	ns	0.7957
				SD(FCb) vs. EE(FP)	ns	0.9462							SD(FCb) vs. EE(FP)	ns	0.4248
				SD(FCb) vs. EE(FCb)	ns	0.952							SD(FCb) vs. EE(FCb)	ns	0.4447
				EE(FP) vs. EE(FCb)	ns	>0.9999							EE(FP) vs. EE(FCb)	ns	0.9989
			24.4141									24.4141
				SD(FP) vs. SD(FCb)	ns	0.9995							SD(FP) vs. SD(FCb)	ns	0.8119
				SD(FP) vs. EE(FP)	ns	0.5853							SD(FP) vs. EE(FP)	ns	0.7428
				SD(FP) vs. EE(FCb)	ns	0.8603							SD(FP) vs. EE(FCb)	ns	0.7181
				SD(FCb) vs. EE(FP)	ns	0.6595							SD(FCb) vs. EE(FP)	ns	0.217
				SD(FCb) vs. EE(FCb)	ns	0.9032							SD(FCb) vs. EE(FCb)	ns	0.2447
				EE(FP) vs. EE(FCb)	ns	0.9865							EE(FP) vs. EE(FCb)	ns	0.9984
			24.9023									24.9023
				SD(FP) vs. SD(FCb)	ns	0.9966							SD(FP) vs. SD(FCb)	ns	>0.9999
				SD(FP) vs. EE(FP)	ns	0.839							SD(FP) vs. EE(FP)	ns	0.0548
				SD(FP) vs. EE(FCb)	ns	0.9717							SD(FP) vs. EE(FCb)	ns	0.3126
				SD(FCb) vs. EE(FP)	ns	0.719							SD(FCb) vs. EE(FP)	ns	0.0572
				SD(FCb) vs. EE(FCb)	ns	0.9216							SD(FCb) vs. EE(FCb)	ns	0.3202
				EE(FP) vs. EE(FCb)	ns	0.9901							EE(FP) vs. EE(FCb)	ns	0.9508
			25.3906									25.3906
				SD(FP) vs. SD(FCb)	ns	0.9921							SD(FP) vs. SD(FCb)	ns	>0.9999
				SD(FP) vs. EE(FP)	ns	0.825							SD(FP) vs. EE(FP)	*	0.0393
				SD(FP) vs. EE(FCb)	ns	0.7619							SD(FP) vs. EE(FCb)	ns	0.2824
				SD(FCb) vs. EE(FP)	ns	0.9413							SD(FCb) vs. EE(FP)	*	0.0393
				SD(FCb) vs. EE(FCb)	ns	0.8891							SD(FCb) vs. EE(FCb)	ns	0.2824
				EE(FP) vs. EE(FCb)	ns	0.9961							EE(FP) vs. EE(FCb)	ns	0.9366
			25.8789									25.8789
				SD(FP) vs. SD(FCb)	ns	0.9966							SD(FP) vs. SD(FCb)	ns	0.978
				SD(FP) vs. EE(FP)	ns	0.6174							SD(FP) vs. EE(FP)	ns	0.2235
				SD(FP) vs. EE(FCb)	ns	0.5707							SD(FP) vs. EE(FCb)	ns	0.1341
				SD(FCb) vs. EE(FP)	ns	0.7518							SD(FCb) vs. EE(FP)	ns	0.4402
				SD(FCb) vs. EE(FCb)	ns	0.693							SD(FCb) vs. EE(FCb)	ns	0.2758
				EE(FP) vs. EE(FCb)	ns	0.9962							EE(FP) vs. EE(FCb)	ns	0.9622
			26.3672									26.3672
				SD(FP) vs. SD(FCb)	ns	>0.9999							SD(FP) vs. SD(FCb)	ns	0.9968
				SD(FP) vs. EE(FP)	ns	0.7413							SD(FP) vs. EE(FP)	ns	0.2622
				SD(FP) vs. EE(FCb)	ns	0.9641							SD(FP) vs. EE(FCb)	ns	0.3607
				SD(FCb) vs. EE(FP)	ns	0.7241							SD(FCb) vs. EE(FP)	ns	0.3739
				SD(FCb) vs. EE(FCb)	ns	0.9583							SD(FCb) vs. EE(FCb)	ns	0.4734
				EE(FP) vs. EE(FCb)	ns	0.9733							EE(FP) vs. EE(FCb)	ns	>0.9999
			26.8555									26.8555
				SD(FP) vs. SD(FCb)	ns	0.9994							SD(FP) vs. SD(FCb)	ns	0.9702
				SD(FP) vs. EE(FP)	ns	0.8839							SD(FP) vs. EE(FP)	ns	0.4932
				SD(FP) vs. EE(FCb)	ns	0.9968							SD(FP) vs. EE(FCb)	ns	0.7766
				SD(FCb) vs. EE(FP)	ns	0.8265							SD(FCb) vs. EE(FP)	ns	0.2406
				SD(FCb) vs. EE(FCb)	ns	0.9997							SD(FCb) vs. EE(FCb)	ns	0.5247
				EE(FP) vs. EE(FCb)	ns	0.8153							EE(FP) vs. EE(FCb)	ns	0.9904
			27.3438									27.3438
				SD(FP) vs. SD(FCb)	ns	0.9584							SD(FP) vs. SD(FCb)	ns	0.9702
				SD(FP) vs. EE(FP)	ns	0.9794							SD(FP) vs. EE(FP)	ns	0.9167
				SD(FP) vs. EE(FCb)	ns	0.9987							SD(FP) vs. EE(FCb)	ns	0.9976
				SD(FCb) vs. EE(FP)	ns	0.7981							SD(FCb) vs. EE(FP)	ns	0.6843
				SD(FCb) vs. EE(FCb)	ns	0.9902							SD(FCb) vs. EE(FCb)	ns	0.9964
				EE(FP) vs. EE(FCb)	ns	0.9553							EE(FP) vs. EE(FCb)	ns	0.8623
			27.832									27.832
				SD(FP) vs. SD(FCb)	ns	0.9203							SD(FP) vs. SD(FCb)	ns	0.9539
				SD(FP) vs. EE(FP)	ns	0.9884							SD(FP) vs. EE(FP)	ns	0.9658
				SD(FP) vs. EE(FCb)	ns	0.9803							SD(FP) vs. EE(FCb)	ns	0.943
				SD(FCb) vs. EE(FP)	ns	0.7614							SD(FCb) vs. EE(FP)	ns	0.745
				SD(FCb) vs. EE(FCb)	ns	0.9974							SD(FCb) vs. EE(FCb)	ns	0.9998
				EE(FP) vs. EE(FCb)	ns	0.9009							EE(FP) vs. EE(FCb)	ns	0.747
			28.3203									28.3203
				SD(FP) vs. SD(FCb)	ns	0.9555							SD(FP) vs. SD(FCb)	ns	0.9238
				SD(FP) vs. EE(FP)	ns	0.5848							SD(FP) vs. EE(FP)	ns	0.6991
				SD(FP) vs. EE(FCb)	ns	0.9962							SD(FP) vs. EE(FCb)	ns	0.9714
				SD(FCb) vs. EE(FP)	ns	0.2746							SD(FCb) vs. EE(FP)	ns	0.3078
				SD(FCb) vs. EE(FCb)	ns	0.9004							SD(FCb) vs. EE(FCb)	ns	0.7425
				EE(FP) vs. EE(FCb)	ns	0.793							EE(FP) vs. EE(FCb)	ns	0.9513
			28.8086									28.8086
				SD(FP) vs. SD(FCb)	ns	>0.9999							SD(FP) vs. SD(FCb)	ns	0.733
				SD(FP) vs. EE(FP)	ns	0.6808							SD(FP) vs. EE(FP)	ns	0.9988
				SD(FP) vs. EE(FCb)	ns	>0.9999							SD(FP) vs. EE(FCb)	ns	0.9999
				SD(FCb) vs. EE(FP)	ns	0.6936							SD(FCb) vs. EE(FP)	ns	0.6196
				SD(FCb) vs. EE(FCb)	ns	>0.9999							SD(FCb) vs. EE(FCb)	ns	0.7425
				EE(FP) vs. EE(FCb)	ns	0.7271							EE(FP) vs. EE(FCb)	ns	>0.9999
			29.2969									29.2969
				SD(FP) vs. SD(FCb)	ns	0.8313							SD(FP) vs. SD(FCb)	ns	0.8308
				SD(FP) vs. EE(FP)	ns	0.9952							SD(FP) vs. EE(FP)	ns	0.9309
				SD(FP) vs. EE(FCb)	ns	0.9416							SD(FP) vs. EE(FCb)	ns	0.9912
				SD(FCb) vs. EE(FP)	ns	0.6808							SD(FCb) vs. EE(FP)	ns	0.4493
				SD(FCb) vs. EE(FCb)	ns	0.9969							SD(FCb) vs. EE(FCb)	ns	0.7085
				EE(FP) vs. EE(FCb)	ns	0.8547							EE(FP) vs. EE(FCb)	ns	0.9948
			29.7852									29.7852
				SD(FP) vs. SD(FCb)	ns	0.9997							SD(FP) vs. SD(FCb)	ns	0.9238
				SD(FP) vs. EE(FP)	ns	0.9191							SD(FP) vs. EE(FP)	ns	0.4076
				SD(FP) vs. EE(FCb)	ns	0.9998							SD(FP) vs. EE(FCb)	ns	0.9841
				SD(FCb) vs. EE(FP)	ns	0.8801							SD(FCb) vs. EE(FP)	ns	0.1244
				SD(FCb) vs. EE(FCb)	ns	>0.9999							SD(FCb) vs. EE(FCb)	ns	0.9966
				EE(FP) vs. EE(FCb)	ns	0.9119							EE(FP) vs. EE(FCb)	ns	0.2851
			30.2734									30.2734
				SD(FP) vs. SD(FCb)	ns	0.9999							SD(FP) vs. SD(FCb)	ns	0.9238
				SD(FP) vs. EE(FP)	ns	0.9191							SD(FP) vs. EE(FP)	ns	0.7227
				SD(FP) vs. EE(FCb)	ns	0.9998							SD(FP) vs. EE(FCb)	ns	0.9452
				SD(FCb) vs. EE(FP)	ns	0.9419							SD(FCb) vs. EE(FP)	ns	0.3283
				SD(FCb) vs. EE(FCb)	ns	0.999							SD(FCb) vs. EE(FCb)	ns	0.6734
				EE(FP) vs. EE(FCb)	ns	0.9119							EE(FP) vs. EE(FCb)	ns	0.9814

## Sheet: postSD_EE (related to Fig.3B)
	Comparison to Baseline (Sidak's multiple comparisons test)
	AW								QW								NREM								REM
	post-SD (FP)		post-SD (FC)		post-EE (FP)		post-EE (FC)		post-SD (FP)		post-SD (FC)		post-EE (FP)		post-EE (FC)		post-SD (FP)		post-SD (FC)		post-EE (FP)		post-EE (FC)		post-SD (FP)		post-SD (FC)		post-EE (FP)		post-EE (FC)
Two-way RM ANOVA	Time:	P< 0.001	Time:	ns	Time:	P< 0.0001	Time:	P = 0.0016	Time:	P = 0.029	Time:	P = 0.019	Time:	P< 0.0001	Time:	P = 0.006	Time:	P< 0.0001	Time:	P=0.002	Time:	P< 0.0001	Time:	P< 0.0001	Time:	P< 0.0001	Time:	P< 0.0001	Time:	P< 0.0001	Time:	P< 0.0001
	Frequency:	P< 0.0001	Frequency:	P< 0.0001	Frequency:	P< 0.0001	Frequency:	P< 0.0001	Frequency:	P< 0.0001	Frequency:	P< 0.0001	Frequency:	P< 0.0001	Frequency:	P< 0.0001	Frequency:	P< 0.0001	Frequency:	P< 0.0001	Frequency:	P< 0.0001	Frequency:	P< 0.0001	Frequency:	P< 0.0001	Frequency:	P< 0.0001	Frequency:	P< 0.0001	Frequency:	P< 0.0001
	Interaction:	ns	Interaction:	ns	Interaction:	P = 0.035	Interaction:	ns	Interaction:	ns	Interaction:	ns	Interaction:	ns	Interaction:	ns	Interaction:	P< 0.0001	Interaction:	ns	Interaction:	P< 0.0001	Interaction:	P< 0.0001	Interaction:	P< 0.0001	Interaction:	ns	Interaction:	P< 0.0001	Interaction:	P=0.027
Frequency	Significance	Ad. P Value	Significance	Ad. P Value	Significance	Ad. P Value	Significance	Ad. P Value	Significance	Ad. P Value	Significance	Ad. P Value	Significance	Ad. P Value	Significance	Ad. P Value	Significance	Ad. P Value	Significance	Ad. P Value	Significance	Ad. P Value	Significance	Ad. P Value	Significance	Ad. P Value	Significance	Ad. P Value	Significance	Ad. P Value	Significance	Ad. P Value
0.488281	**	0.0033	****	<0.0001	****	<0.0001	****	<0.0001	ns	>0.9999	ns	0.0792	ns	>0.9999	ns	>0.9999	ns	>0.9999	ns	>0.9999	ns	>0.9999	ns	>0.9999	ns	>0.9999	ns	>0.9999	ns	>0.9999	*	0.0169
0.976563	**	0.0038	*	0.0115	ns	0.9026	ns	0.3158	ns	>0.9999	ns	>0.9999	**	0.0067	ns	>0.9999	**	0.0061	ns	0.3755	ns	>0.9999	ns	>0.9999	ns	>0.9999	ns	>0.9999	ns	>0.9999	ns	>0.9999
1.46484	ns	0.9996	ns	>0.9999	ns	>0.9999	ns	>0.9999	ns	0.7824	ns	0.5921	****	<0.0001	ns	>0.9999	****	<0.0001	****	<0.0001	****	<0.0001	****	<0.0001	ns	>0.9999	ns	>0.9999	ns	>0.9999	ns	>0.9999
1.95312	ns	>0.9999	ns	>0.9999	ns	>0.9999	ns	>0.9999	ns	>0.9999	*	0.0169	*	0.0292	***	0.0001	****	<0.0001	****	<0.0001	****	<0.0001	****	<0.0001	ns	>0.9999	ns	>0.9999	ns	>0.9999	ns	0.9083
2.44141	ns	>0.9999	ns	>0.9999	ns	>0.9999	ns	>0.9999	ns	>0.9999	*	0.0112	ns	0.1825	ns	0.0716	****	<0.0001	****	<0.0001	****	<0.0001	****	<0.0001	ns	0.9997	ns	>0.9999	ns	>0.9999	ns	0.9993
2.92969	ns	>0.9999	ns	>0.9999	ns	>0.9999	ns	>0.9999	ns	0.9779	*	0.0169	*	0.0239	**	0.0064	**	0.0043	ns	0.0958	****	<0.0001	****	<0.0001	ns	>0.9999	ns	>0.9999	ns	>0.9999	ns	0.8583
3.41797	ns	>0.9999	ns	>0.9999	ns	>0.9999	ns	>0.9999	ns	0.3189	*	0.0254	ns	0.0527	***	0.0004	ns	0.818	ns	0.9982	***	0.0002	***	0.0002	ns	>0.9999	ns	>0.9999	ns	>0.9999	ns	0.7961
3.90625	ns	>0.9999	ns	>0.9999	ns	>0.9999	ns	>0.9999	ns	>0.9999	ns	0.2507	ns	0.3795	***	0.0001	ns	>0.9999	ns	>0.9999	ns	0.2937	ns	0.2293	ns	>0.9999	ns	>0.9999	ns	>0.9999	ns	>0.9999
4.39453	ns	>0.9999	ns	>0.9999	ns	>0.9999	ns	>0.9999	ns	>0.9999	ns	0.942	ns	0.5974	*	0.0226	ns	>0.9999	ns	>0.9999	ns	0.9326	ns	0.9997	ns	>0.9999	ns	>0.9999	ns	0.9986	ns	>0.9999
4.88281	ns	>0.9999	ns	>0.9999	ns	>0.9999	ns	>0.9999	ns	>0.9999	ns	0.9757	ns	0.4305	ns	0.9319	ns	>0.9999	ns	>0.9999	ns	0.9555	ns	>0.9999	ns	>0.9999	ns	>0.9999	ns	>0.9999	ns	0.486
5.37109	ns	>0.9999	ns	>0.9999	ns	>0.9999	ns	>0.9999	ns	>0.9999	ns	0.9999	ns	0.9474	ns	>0.9999	ns	>0.9999	ns	>0.9999	ns	>0.9999	ns	>0.9999	ns	>0.9999	ns	0.9997	ns	>0.9999	ns	0.8583
5.85938	ns	>0.9999	ns	>0.9999	ns	0.7127	ns	>0.9999	ns	>0.9999	ns	0.9979	ns	0.9984	ns	>0.9999	ns	>0.9999	ns	>0.9999	ns	>0.9999	ns	>0.9999	ns	>0.9999	ns	>0.9999	ns	>0.9999	ns	>0.9999
6.34766	ns	>0.9999	ns	>0.9999	*	0.0253	ns	0.9776	ns	>0.9999	ns	0.7551	ns	>0.9999	ns	>0.9999	ns	>0.9999	ns	>0.9999	ns	>0.9999	ns	>0.9999	ns	>0.9999	ns	0.6028	ns	0.9537	ns	0.1133
6.83594	ns	>0.9999	ns	>0.9999	**	0.004	ns	0.8463	ns	>0.9999	ns	>0.9999	ns	>0.9999	ns	>0.9999	ns	>0.9999	ns	>0.9999	ns	>0.9999	ns	>0.9999	ns	0.7171	ns	0.3861	****	<0.0001	ns	0.1443
7.32422	ns	>0.9999	ns	>0.9999	****	<0.0001	ns	0.9776	ns	>0.9999	ns	>0.9999	ns	>0.9999	ns	>0.9999	ns	>0.9999	ns	>0.9999	ns	>0.9999	ns	>0.9999	****	<0.0001	ns	0.1141	****	<0.0001	***	0.0002
7.8125	ns	0.1088	ns	>0.9999	****	<0.0001	ns	>0.9999	ns	>0.9999	ns	>0.9999	ns	>0.9999	ns	>0.9999	ns	>0.9999	ns	>0.9999	ns	>0.9999	ns	>0.9999	****	<0.0001	ns	0.1141	****	<0.0001	ns	0.3418
8.30078	**	0.0047	ns	>0.9999	ns	0.8385	ns	>0.9999	ns	>0.9999	ns	>0.9999	ns	>0.9999	ns	>0.9999	ns	>0.9999	ns	>0.9999	ns	>0.9999	ns	>0.9999	****	<0.0001	ns	0.6028	****	<0.0001	ns	>0.9999
8.78906	ns	0.1279	ns	>0.9999	ns	0.9383	ns	>0.9999	ns	>0.9999	ns	>0.9999	ns	>0.9999	ns	>0.9999	ns	>0.9999	ns	>0.9999	ns	>0.9999	ns	>0.9999	****	<0.0001	ns	>0.9999	****	<0.0001	ns	0.9858
9.27734	ns	>0.9999	ns	>0.9999	ns	0.8883	ns	>0.9999	ns	>0.9999	ns	>0.9999	ns	>0.9999	ns	>0.9999	ns	>0.9999	ns	>0.9999	ns	>0.9999	ns	>0.9999	ns	0.0716	ns	>0.9999	****	<0.0001	ns	>0.9999
9.76562	ns	>0.9999	ns	>0.9999	ns	>0.9999	ns	>0.9999	ns	>0.9999	ns	>0.9999	ns	>0.9999	ns	>0.9999	ns	>0.9999	ns	>0.9999	ns	>0.9999	ns	>0.9999	ns	0.9935	ns	0.6778	ns	0.0591	ns	>0.9999
10.2539	ns	>0.9999	ns	>0.9999	ns	>0.9999	ns	>0.9999	ns	>0.9999	ns	>0.9999	ns	>0.9999	ns	>0.9999	ns	>0.9999	ns	>0.9999	ns	>0.9999	ns	>0.9999	ns	>0.9999	ns	>0.9999	ns	0.3886	ns	0.1443
10.7422	ns	>0.9999	ns	>0.9999	ns	>0.9999	ns	>0.9999	ns	>0.9999	ns	>0.9999	ns	>0.9999	ns	>0.9999	ns	>0.9999	ns	>0.9999	ns	>0.9999	ns	>0.9999	ns	>0.9999	ns	0.2681	ns	0.6503	*	0.0226
11.2305	ns	>0.9999	ns	>0.9999	ns	>0.9999	ns	>0.9999	ns	>0.9999	ns	>0.9999	ns	>0.9999	ns	>0.9999	ns	>0.9999	ns	>0.9999	ns	>0.9999	ns	>0.9999	ns	>0.9999	*	0.0331	ns	0.6203	*	0.0226
11.7188	ns	>0.9999	ns	>0.9999	ns	>0.9999	ns	>0.9999	ns	>0.9999	ns	>0.9999	ns	>0.9999	ns	>0.9999	ns	>0.9999	ns	>0.9999	ns	>0.9999	ns	>0.9999	ns	>0.9999	*	0.0331	ns	0.56	ns	0.4107
12.207	ns	>0.9999	ns	>0.9999	ns	>0.9999	ns	>0.9999	ns	>0.9999	ns	>0.9999	ns	>0.9999	ns	>0.9999	ns	>0.9999	ns	>0.9999	ns	>0.9999	ns	>0.9999	ns	>0.9999	ns	0.9933	ns	0.9953	ns	0.9993
12.6953	ns	>0.9999	ns	>0.9999	ns	>0.9999	ns	>0.9999	ns	>0.9999	ns	>0.9999	ns	>0.9999	ns	>0.9999	ns	>0.9999	ns	>0.9999	ns	>0.9999	ns	>0.9999	ns	>0.9999	ns	0.9973	ns	0.7646	ns	0.9858
13.1836	ns	>0.9999	ns	>0.9999	ns	>0.9999	ns	>0.9999	ns	>0.9999	ns	>0.9999	ns	>0.9999	ns	>0.9999	ns	>0.9999	ns	>0.9999	ns	>0.9999	ns	>0.9999	ns	>0.9999	ns	0.9933	ns	0.8606	ns	0.7961
13.6719	ns	>0.9999	ns	>0.9999	ns	>0.9999	ns	>0.9999	ns	>0.9999	ns	>0.9999	ns	>0.9999	ns	>0.9999	ns	>0.9999	ns	>0.9999	ns	>0.9999	ns	>0.9999	ns	>0.9999	ns	>0.9999	ns	>0.9999	ns	0.9706
14.1602	ns	>0.9999	ns	>0.9999	ns	>0.9999	ns	>0.9999	ns	>0.9999	ns	>0.9999	ns	>0.9999	ns	>0.9999	ns	>0.9999	ns	>0.9999	ns	>0.9999	ns	>0.9999	ns	>0.9999	ns	>0.9999	ns	>0.9999	ns	0.9858
14.6484	ns	>0.9999	ns	>0.9999	ns	>0.9999	ns	>0.9999	ns	>0.9999	ns	>0.9999	ns	>0.9999	ns	>0.9999	ns	>0.9999	ns	>0.9999	ns	>0.9999	ns	>0.9999	ns	>0.9999	ns	0.9997	ns	>0.9999	ns	>0.9999
15.1367	ns	>0.9999	ns	>0.9999	ns	>0.9999	ns	>0.9999	ns	>0.9999	ns	>0.9999	ns	>0.9999	ns	>0.9999	ns	>0.9999	ns	>0.9999	ns	>0.9999	ns	>0.9999	ns	>0.9999	ns	>0.9999	ns	>0.9999	ns	>0.9999
15.625	ns	>0.9999	ns	>0.9999	ns	>0.9999	ns	>0.9999	ns	>0.9999	ns	>0.9999	ns	>0.9999	ns	>0.9999	ns	>0.9999	ns	>0.9999	ns	>0.9999	ns	>0.9999	ns	>0.9999	ns	>0.9999	ns	>0.9999	ns	>0.9999
16.1133	ns	>0.9999	ns	>0.9999	ns	>0.9999	ns	>0.9999	ns	>0.9999	ns	>0.9999	ns	>0.9999	ns	>0.9999	ns	>0.9999	ns	>0.9999	ns	>0.9999	ns	>0.9999	ns	>0.9999	ns	>0.9999	ns	>0.9999	ns	>0.9999
16.6016	ns	>0.9999	ns	>0.9999	ns	>0.9999	ns	>0.9999	ns	>0.9999	ns	>0.9999	ns	>0.9999	ns	>0.9999	ns	>0.9999	ns	>0.9999	ns	>0.9999	ns	>0.9999	ns	>0.9999	ns	>0.9999	ns	>0.9999	ns	>0.9999
17.0898	ns	>0.9999	ns	>0.9999	ns	>0.9999	ns	>0.9999	ns	>0.9999	ns	>0.9999	ns	>0.9999	ns	>0.9999	ns	>0.9999	ns	>0.9999	ns	>0.9999	ns	>0.9999	ns	>0.9999	ns	>0.9999	ns	>0.9999	ns	>0.9999
17.5781	ns	>0.9999	ns	>0.9999	ns	>0.9999	ns	>0.9999	ns	>0.9999	ns	>0.9999	ns	>0.9999	ns	>0.9999	ns	>0.9999	ns	>0.9999	ns	>0.9999	ns	>0.9999	ns	>0.9999	ns	>0.9999	ns	>0.9999	ns	>0.9999
18.0664	ns	>0.9999	ns	>0.9999	ns	>0.9999	ns	>0.9999	ns	>0.9999	ns	>0.9999	ns	>0.9999	ns	>0.9999	ns	>0.9999	ns	>0.9999	ns	>0.9999	ns	>0.9999	ns	>0.9999	ns	>0.9999	ns	>0.9999	ns	>0.9999
18.5547	ns	>0.9999	ns	>0.9999	ns	>0.9999	ns	>0.9999	ns	>0.9999	ns	>0.9999	ns	>0.9999	ns	>0.9999	ns	>0.9999	ns	>0.9999	ns	>0.9999	ns	>0.9999	ns	>0.9999	ns	>0.9999	ns	>0.9999	ns	>0.9999
19.043	ns	>0.9999	ns	>0.9999	ns	>0.9999	ns	>0.9999	ns	>0.9999	ns	>0.9999	ns	>0.9999	ns	>0.9999	ns	>0.9999	ns	>0.9999	ns	>0.9999	ns	>0.9999	ns	>0.9999	ns	>0.9999	ns	>0.9999	ns	>0.9999
19.5312	ns	>0.9999	ns	>0.9999	ns	>0.9999	ns	>0.9999	ns	>0.9999	ns	>0.9999	ns	>0.9999	ns	>0.9999	ns	>0.9999	ns	>0.9999	ns	>0.9999	ns	>0.9999	ns	>0.9999	ns	>0.9999	ns	>0.9999	ns	>0.9999
20.0195	ns	>0.9999	ns	>0.9999	ns	>0.9999	ns	>0.9999	ns	>0.9999	ns	>0.9999	ns	>0.9999	ns	>0.9999	ns	>0.9999	ns	>0.9999	ns	>0.9999	ns	>0.9999	ns	>0.9999	ns	>0.9999	ns	>0.9999	ns	>0.9999
20.5078	ns	>0.9999	ns	>0.9999	ns	>0.9999	ns	>0.9999	ns	>0.9999	ns	>0.9999	ns	>0.9999	ns	>0.9999	ns	>0.9999	ns	>0.9999	ns	>0.9999	ns	>0.9999	ns	>0.9999	ns	>0.9999	ns	>0.9999	ns	>0.9999
20.9961	ns	>0.9999	ns	>0.9999	ns	>0.9999	ns	>0.9999	ns	>0.9999	ns	>0.9999	ns	>0.9999	ns	>0.9999	ns	>0.9999	ns	>0.9999	ns	>0.9999	ns	>0.9999	ns	>0.9999	ns	>0.9999	ns	>0.9999	ns	>0.9999
21.4844	ns	>0.9999	ns	>0.9999	ns	>0.9999	ns	>0.9999	ns	>0.9999	ns	>0.9999	ns	>0.9999	ns	>0.9999	ns	>0.9999	ns	>0.9999	ns	>0.9999	ns	>0.9999	ns	>0.9999	ns	>0.9999	ns	>0.9999	ns	>0.9999
21.9727	ns	>0.9999	ns	>0.9999	ns	>0.9999	ns	>0.9999	ns	>0.9999	ns	>0.9999	ns	>0.9999	ns	>0.9999	ns	>0.9999	ns	>0.9999	ns	>0.9999	ns	>0.9999	ns	>0.9999	ns	>0.9999	ns	>0.9999	ns	>0.9999
22.4609	ns	>0.9999	ns	>0.9999	ns	>0.9999	ns	>0.9999	ns	>0.9999	ns	>0.9999	ns	>0.9999	ns	>0.9999	ns	>0.9999	ns	>0.9999	ns	>0.9999	ns	>0.9999	ns	>0.9999	ns	>0.9999	ns	>0.9999	ns	>0.9999
22.9492	ns	>0.9999	ns	>0.9999	ns	>0.9999	ns	>0.9999	ns	>0.9999	ns	>0.9999	ns	>0.9999	ns	>0.9999	ns	>0.9999	ns	>0.9999	ns	>0.9999	ns	>0.9999	ns	>0.9999	ns	>0.9999	ns	>0.9999	ns	>0.9999
23.4375	ns	>0.9999	ns	>0.9999	ns	>0.9999	ns	>0.9999	ns	>0.9999	ns	>0.9999	ns	>0.9999	ns	>0.9999	ns	>0.9999	ns	>0.9999	ns	>0.9999	ns	>0.9999	ns	>0.9999	ns	>0.9999	ns	>0.9999	ns	>0.9999
23.9258	ns	>0.9999	ns	>0.9999	ns	>0.9999	ns	>0.9999	ns	>0.9999	ns	>0.9999	ns	>0.9999	ns	>0.9999	ns	>0.9999	ns	>0.9999	ns	>0.9999	ns	>0.9999	ns	>0.9999	ns	>0.9999	ns	>0.9999	ns	>0.9999
24.4141	ns	>0.9999	ns	>0.9999	ns	>0.9999	ns	>0.9999	ns	>0.9999	ns	>0.9999	ns	>0.9999	ns	>0.9999	ns	>0.9999	ns	>0.9999	ns	>0.9999	ns	>0.9999	ns	>0.9999	ns	>0.9999	ns	>0.9999	ns	>0.9999
24.9023	ns	>0.9999	ns	>0.9999	ns	>0.9999	ns	>0.9999	ns	>0.9999	ns	>0.9999	ns	>0.9999	ns	>0.9999	ns	>0.9999	ns	>0.9999	ns	>0.9999	ns	>0.9999	ns	>0.9999	ns	>0.9999	ns	>0.9999	ns	>0.9999
25.3906	ns	>0.9999	ns	>0.9999	ns	>0.9999	ns	>0.9999	ns	>0.9999	ns	>0.9999	ns	>0.9999	ns	>0.9999	ns	>0.9999	ns	>0.9999	ns	>0.9999	ns	>0.9999	ns	>0.9999	ns	>0.9999	ns	>0.9999	ns	>0.9999
25.8789	ns	>0.9999	ns	>0.9999	ns	>0.9999	ns	>0.9999	ns	>0.9999	ns	>0.9999	ns	>0.9999	ns	>0.9999	ns	>0.9999	ns	>0.9999	ns	>0.9999	ns	>0.9999	ns	>0.9999	ns	>0.9999	ns	>0.9999	ns	>0.9999
26.3672	ns	>0.9999	ns	>0.9999	ns	>0.9999	ns	>0.9999	ns	>0.9999	ns	>0.9999	ns	>0.9999	ns	>0.9999	ns	>0.9999	ns	>0.9999	ns	>0.9999	ns	>0.9999	ns	>0.9999	ns	>0.9999	ns	>0.9999	ns	>0.9999
26.8555	ns	>0.9999	ns	>0.9999	ns	>0.9999	ns	>0.9999	ns	>0.9999	ns	>0.9999	ns	>0.9999	ns	>0.9999	ns	>0.9999	ns	>0.9999	ns	>0.9999	ns	>0.9999	ns	>0.9999	ns	>0.9999	ns	>0.9999	ns	>0.9999
27.3438	ns	>0.9999	ns	>0.9999	ns	>0.9999	ns	>0.9999	ns	>0.9999	ns	>0.9999	ns	>0.9999	ns	>0.9999	ns	>0.9999	ns	>0.9999	ns	>0.9999	ns	>0.9999	ns	>0.9999	ns	>0.9999	ns	>0.9999	ns	>0.9999
27.832	ns	>0.9999	ns	>0.9999	ns	>0.9999	ns	>0.9999	ns	>0.9999	ns	>0.9999	ns	>0.9999	ns	>0.9999	ns	>0.9999	ns	>0.9999	ns	>0.9999	ns	>0.9999	ns	>0.9999	ns	>0.9999	ns	>0.9999	ns	>0.9999
28.3203	ns	>0.9999	ns	>0.9999	ns	>0.9999	ns	>0.9999	ns	>0.9999	ns	>0.9999	ns	>0.9999	ns	>0.9999	ns	>0.9999	ns	>0.9999	ns	>0.9999	ns	>0.9999	ns	>0.9999	ns	>0.9999	ns	>0.9999	ns	>0.9999
28.8086	ns	>0.9999	ns	>0.9999	ns	>0.9999	ns	>0.9999	ns	>0.9999	ns	>0.9999	ns	>0.9999	ns	>0.9999	ns	>0.9999	ns	>0.9999	ns	>0.9999	ns	>0.9999	ns	>0.9999	ns	>0.9999	ns	>0.9999	ns	>0.9999
29.2969	ns	>0.9999	ns	>0.9999	ns	>0.9999	ns	>0.9999	ns	>0.9999	ns	>0.9999	ns	>0.9999	ns	>0.9999	ns	>0.9999	ns	>0.9999	ns	>0.9999	ns	>0.9999	ns	>0.9999	ns	>0.9999	ns	>0.9999	ns	>0.9999
29.7852	ns	>0.9999	ns	>0.9999	ns	>0.9999	ns	>0.9999	ns	>0.9999	ns	>0.9999	ns	>0.9999	ns	>0.9999	ns	>0.9999	ns	>0.9999	ns	>0.9999	ns	>0.9999	ns	>0.9999	ns	>0.9999	ns	>0.9999	ns	>0.9999
30.2734	ns	>0.9999	ns	>0.9999	ns	>0.9999	ns	>0.9999	ns	>0.9999	ns	>0.9999	ns	>0.9999	ns	>0.9999	ns	>0.9999	ns	>0.9999	ns	>0.9999	ns	>0.9999	ns	>0.9999	ns	>0.9999	ns	>0.9999	ns	>0.9999
30.7617	ns	>0.9999	ns	>0.9999	ns	>0.9999	ns	>0.9999	ns	>0.9999	ns	>0.9999	ns	>0.9999	ns	>0.9999	ns	>0.9999	ns	>0.9999	ns	>0.9999	ns	>0.9999	ns	>0.9999	ns	>0.9999	ns	>0.9999	ns	>0.9999
31.25	ns	>0.9999	ns	>0.9999	ns	>0.9999	ns	>0.9999	ns	>0.9999	ns	>0.9999	ns	>0.9999	ns	>0.9999	ns	>0.9999	ns	>0.9999	ns	>0.9999	ns	>0.9999	ns	>0.9999	ns	>0.9999	ns	>0.9999	ns	>0.9999
31.7383	ns	>0.9999	ns	>0.9999	ns	>0.9999	ns	>0.9999	ns	>0.9999	ns	>0.9999	ns	>0.9999	ns	>0.9999	ns	>0.9999	ns	>0.9999	ns	>0.9999	ns	>0.9999	ns	>0.9999	ns	>0.9999	ns	>0.9999	ns	>0.9999
32.2266	ns	>0.9999	ns	>0.9999	ns	>0.9999	ns	>0.9999	ns	>0.9999	ns	>0.9999	ns	>0.9999	ns	>0.9999	ns	>0.9999	ns	>0.9999	ns	>0.9999	ns	>0.9999	ns	>0.9999	ns	>0.9999	ns	>0.9999	ns	>0.9999
32.7148	ns	>0.9999	ns	>0.9999	ns	>0.9999	ns	>0.9999	ns	>0.9999	ns	>0.9999	ns	>0.9999	ns	>0.9999	ns	>0.9999	ns	>0.9999	ns	>0.9999	ns	>0.9999	ns	>0.9999	ns	>0.9999	ns	>0.9999	ns	>0.9999
33.2031	ns	>0.9999	ns	>0.9999	ns	>0.9999	ns	>0.9999	ns	>0.9999	ns	>0.9999	ns	>0.9999	ns	>0.9999	ns	>0.9999	ns	>0.9999	ns	>0.9999	ns	>0.9999	ns	>0.9999	ns	>0.9999	ns	>0.9999	ns	>0.9999
33.6914	ns	>0.9999	ns	>0.9999	ns	>0.9999	ns	>0.9999	ns	>0.9999	ns	>0.9999	ns	>0.9999	ns	>0.9999	ns	>0.9999	ns	>0.9999	ns	>0.9999	ns	>0.9999	ns	>0.9999	ns	>0.9999	ns	>0.9999	ns	>0.9999
34.1797	ns	>0.9999	ns	>0.9999	ns	>0.9999	ns	>0.9999	ns	>0.9999	ns	>0.9999	ns	>0.9999	ns	>0.9999	ns	>0.9999	ns	>0.9999	ns	>0.9999	ns	>0.9999	ns	>0.9999	ns	>0.9999	ns	>0.9999	ns	>0.9999
34.668	ns	>0.9999	ns	>0.9999	ns	>0.9999	ns	>0.9999	ns	>0.9999	ns	>0.9999	ns	>0.9999	ns	>0.9999	ns	>0.9999	ns	>0.9999	ns	>0.9999	ns	>0.9999	ns	>0.9999	ns	>0.9999	ns	>0.9999	ns	>0.9999
35.1562	ns	>0.9999	ns	>0.9999	ns	>0.9999	ns	>0.9999	ns	>0.9999	ns	>0.9999	ns	>0.9999	ns	>0.9999	ns	>0.9999	ns	>0.9999	ns	>0.9999	ns	>0.9999	ns	>0.9999	ns	>0.9999	ns	>0.9999	ns	>0.9999
35.6445	ns	>0.9999	ns	>0.9999	ns	>0.9999	ns	>0.9999	ns	>0.9999	ns	>0.9999	ns	>0.9999	ns	>0.9999	ns	>0.9999	ns	>0.9999	ns	>0.9999	ns	>0.9999	ns	>0.9999	ns	>0.9999	ns	>0.9999	ns	>0.9999
36.1328	ns	>0.9999	ns	>0.9999	ns	>0.9999	ns	>0.9999	ns	>0.9999	ns	>0.9999	ns	>0.9999	ns	>0.9999	ns	>0.9999	ns	>0.9999	ns	>0.9999	ns	>0.9999	ns	>0.9999	ns	>0.9999	ns	>0.9999	ns	>0.9999
36.6211	ns	>0.9999	ns	>0.9999	ns	>0.9999	ns	>0.9999	ns	>0.9999	ns	>0.9999	ns	>0.9999	ns	>0.9999	ns	>0.9999	ns	>0.9999	ns	>0.9999	ns	>0.9999	ns	>0.9999	ns	>0.9999	ns	>0.9999	ns	>0.9999
37.1094	ns	>0.9999	ns	>0.9999	ns	>0.9999	ns	>0.9999	ns	>0.9999	ns	>0.9999	ns	>0.9999	ns	>0.9999	ns	>0.9999	ns	>0.9999	ns	>0.9999	ns	>0.9999	ns	>0.9999	ns	>0.9999	ns	>0.9999	ns	>0.9999
37.5977	ns	>0.9999	ns	>0.9999	ns	>0.9999	ns	>0.9999	ns	>0.9999	ns	>0.9999	ns	>0.9999	ns	>0.9999	ns	>0.9999	ns	>0.9999	ns	>0.9999	ns	>0.9999	ns	>0.9999	ns	>0.9999	ns	>0.9999	ns	>0.9999
38.0859	ns	>0.9999	ns	>0.9999	ns	>0.9999	ns	>0.9999	ns	>0.9999	ns	>0.9999	ns	>0.9999	ns	>0.9999	ns	>0.9999	ns	>0.9999	ns	>0.9999	ns	>0.9999	ns	>0.9999	ns	>0.9999	ns	>0.9999	ns	>0.9999
38.5742	ns	>0.9999	ns	>0.9999	ns	>0.9999	ns	>0.9999	ns	>0.9999	ns	>0.9999	ns	>0.9999	ns	>0.9999	ns	>0.9999	ns	>0.9999	ns	>0.9999	ns	>0.9999	ns	>0.9999	ns	>0.9999	ns	>0.9999	ns	>0.9999
39.0625	ns	>0.9999	ns	>0.9999	ns	>0.9999	ns	>0.9999	ns	>0.9999	ns	>0.9999	ns	>0.9999	ns	>0.9999	ns	>0.9999	ns	>0.9999	ns	>0.9999	ns	>0.9999	ns	>0.9999	ns	>0.9999	ns	>0.9999	ns	>0.9999
39.5508	ns	>0.9999	ns	>0.9999	ns	>0.9999	ns	>0.9999	ns	>0.9999	ns	>0.9999	ns	>0.9999	ns	>0.9999	ns	>0.9999	ns	>0.9999	ns	>0.9999	ns	>0.9999	ns	>0.9999	ns	>0.9999	ns	>0.9999	ns	>0.9999
40.0391	ns	>0.9999	ns	>0.9999	ns	>0.9999	ns	>0.9999	ns	>0.9999	ns	>0.9999	ns	>0.9999	ns	>0.9999	ns	>0.9999	ns	>0.9999	ns	>0.9999	ns	>0.9999	ns	>0.9999	ns	>0.9999	ns	>0.9999	ns	>0.9999
40.5273	ns	>0.9999	ns	>0.9999	ns	>0.9999	ns	>0.9999	ns	>0.9999	ns	>0.9999	ns	>0.9999	ns	>0.9999	ns	>0.9999	ns	>0.9999	ns	>0.9999	ns	>0.9999	ns	>0.9999	ns	>0.9999	ns	>0.9999	ns	>0.9999
41.0156	ns	>0.9999	ns	>0.9999	ns	>0.9999	ns	>0.9999	ns	>0.9999	ns	>0.9999	ns	>0.9999	ns	>0.9999	ns	>0.9999	ns	>0.9999	ns	>0.9999	ns	>0.9999	ns	>0.9999	ns	>0.9999	ns	>0.9999	ns	>0.9999
41.5039	ns	>0.9999	ns	>0.9999	ns	>0.9999	ns	>0.9999	ns	>0.9999	ns	>0.9999	ns	>0.9999	ns	>0.9999	ns	>0.9999	ns	>0.9999	ns	>0.9999	ns	>0.9999	ns	>0.9999	ns	>0.9999	ns	>0.9999	ns	>0.9999
41.9922	ns	>0.9999	ns	>0.9999	ns	>0.9999	ns	>0.9999	ns	>0.9999	ns	>0.9999	ns	>0.9999	ns	>0.9999	ns	>0.9999	ns	>0.9999	ns	>0.9999	ns	>0.9999	ns	>0.9999	ns	>0.9999	ns	>0.9999	ns	>0.9999
42.4805	ns	>0.9999	ns	>0.9999	ns	>0.9999	ns	>0.9999	ns	>0.9999	ns	>0.9999	ns	>0.9999	ns	>0.9999	ns	>0.9999	ns	>0.9999	ns	>0.9999	ns	>0.9999	ns	>0.9999	ns	>0.9999	ns	>0.9999	ns	>0.9999
42.9688	ns	>0.9999	ns	>0.9999	ns	>0.9999	ns	>0.9999	ns	>0.9999	ns	>0.9999	ns	>0.9999	ns	>0.9999	ns	>0.9999	ns	>0.9999	ns	>0.9999	ns	>0.9999	ns	>0.9999	ns	>0.9999	ns	>0.9999	ns	>0.9999
43.457	ns	>0.9999	ns	>0.9999	ns	>0.9999	ns	>0.9999	ns	>0.9999	ns	>0.9999	ns	>0.9999	ns	>0.9999	ns	>0.9999	ns	>0.9999	ns	>0.9999	ns	>0.9999	ns	>0.9999	ns	>0.9999	ns	>0.9999	ns	>0.9999
43.9453	ns	>0.9999	ns	>0.9999	ns	>0.9999	ns	>0.9999	ns	>0.9999	ns	>0.9999	ns	>0.9999	ns	>0.9999	ns	>0.9999	ns	>0.9999	ns	>0.9999	ns	>0.9999	ns	>0.9999	ns	>0.9999	ns	>0.9999	ns	>0.9999
44.4336	ns	>0.9999	ns	>0.9999	ns	>0.9999	ns	>0.9999	ns	>0.9999	ns	>0.9999	ns	>0.9999	ns	>0.9999	ns	>0.9999	ns	>0.9999	ns	>0.9999	ns	>0.9999	ns	>0.9999	ns	>0.9999	ns	>0.9999	ns	>0.9999
44.9219	ns	>0.9999	ns	>0.9999	ns	>0.9999	ns	>0.9999	ns	>0.9999	ns	>0.9999	ns	>0.9999	ns	>0.9999	ns	>0.9999	ns	>0.9999	ns	>0.9999	ns	>0.9999	ns	>0.9999	ns	>0.9999	ns	>0.9999	ns	>0.9999
45.4102	ns	>0.9999	ns	>0.9999	ns	>0.9999	ns	>0.9999	ns	>0.9999	ns	>0.9999	ns	>0.9999	ns	>0.9999	ns	>0.9999	ns	>0.9999	ns	>0.9999	ns	>0.9999	ns	>0.9999	ns	>0.9999	ns	>0.9999	ns	>0.9999
45.8984	ns	>0.9999	ns	>0.9999	ns	>0.9999	ns	>0.9999	ns	>0.9999	ns	>0.9999	ns	>0.9999	ns	>0.9999	ns	>0.9999	ns	>0.9999	ns	>0.9999	ns	>0.9999	ns	>0.9999	ns	>0.9999	ns	>0.9999	ns	>0.9999
46.3867	ns	>0.9999	ns	>0.9999	ns	>0.9999	ns	>0.9999	ns	>0.9999	ns	>0.9999	ns	>0.9999	ns	>0.9999	ns	>0.9999	ns	>0.9999	ns	>0.9999	ns	>0.9999	ns	>0.9999	ns	>0.9999	ns	>0.9999	ns	>0.9999
46.875	ns	>0.9999	ns	>0.9999	ns	>0.9999	ns	>0.9999	ns	>0.9999	ns	>0.9999	ns	>0.9999	ns	>0.9999	ns	>0.9999	ns	>0.9999	ns	>0.9999	ns	>0.9999	ns	>0.9999	ns	>0.9999	ns	>0.9999	ns	>0.9999
47.3633	ns	>0.9999	ns	>0.9999	ns	>0.9999	ns	>0.9999	ns	>0.9999	ns	>0.9999	ns	>0.9999	ns	>0.9999	ns	>0.9999	ns	>0.9999	ns	>0.9999	ns	>0.9999	ns	>0.9999	ns	>0.9999	ns	>0.9999	ns	>0.9999
47.8516	ns	>0.9999	ns	>0.9999	ns	>0.9999	ns	>0.9999	ns	>0.9999	ns	>0.9999	ns	>0.9999	ns	>0.9999	ns	>0.9999	ns	>0.9999	ns	>0.9999	ns	>0.9999	ns	>0.9999	ns	>0.9999	ns	>0.9999	ns	>0.9999
48.3398	ns	>0.9999	ns	>0.9999	ns	>0.9999	ns	>0.9999	ns	>0.9999	ns	>0.9999	ns	>0.9999	ns	>0.9999	ns	>0.9999	ns	>0.9999	ns	>0.9999	ns	>0.9999	ns	>0.9999	ns	>0.9999	ns	>0.9999	ns	>0.9999
48.8281	ns	>0.9999	ns	>0.9999	ns	>0.9999	ns	>0.9999	ns	>0.9999	ns	>0.9999	ns	>0.9999	ns	>0.9999	ns	>0.9999	ns	>0.9999	ns	>0.9999	ns	>0.9999	ns	>0.9999	ns	>0.9999	ns	>0.9999	ns	>0.9999
49.3164	ns	>0.9999	ns	>0.9999	ns	>0.9999	ns	>0.9999	ns	>0.9999	ns	>0.9999	ns	>0.9999	ns	>0.9999	ns	>0.9999	ns	>0.9999	ns	>0.9999	ns	>0.9999	ns	>0.9999	ns	>0.9999	ns	>0.9999	ns	>0.9999
49.8047	ns	>0.9999	ns	>0.9999	ns	>0.9999	ns	>0.9999	ns	>0.9999	ns	>0.9999	ns	>0.9999	ns	>0.9999	ns	>0.9999	ns	>0.9999	ns	>0.9999	ns	>0.9999	ns	>0.9999	ns	>0.9999	ns	>0.9999	ns	>0.9999
